# Supplementary material for: Molecular and Functional Evolution of the Spermatophyte Sesquiterpene Synthases
Source: MDPI journal article supplement (doi:10.3390/ijms22126348), 2021-06-14
Supplement: s1 [file s1]

## Supplementary Information

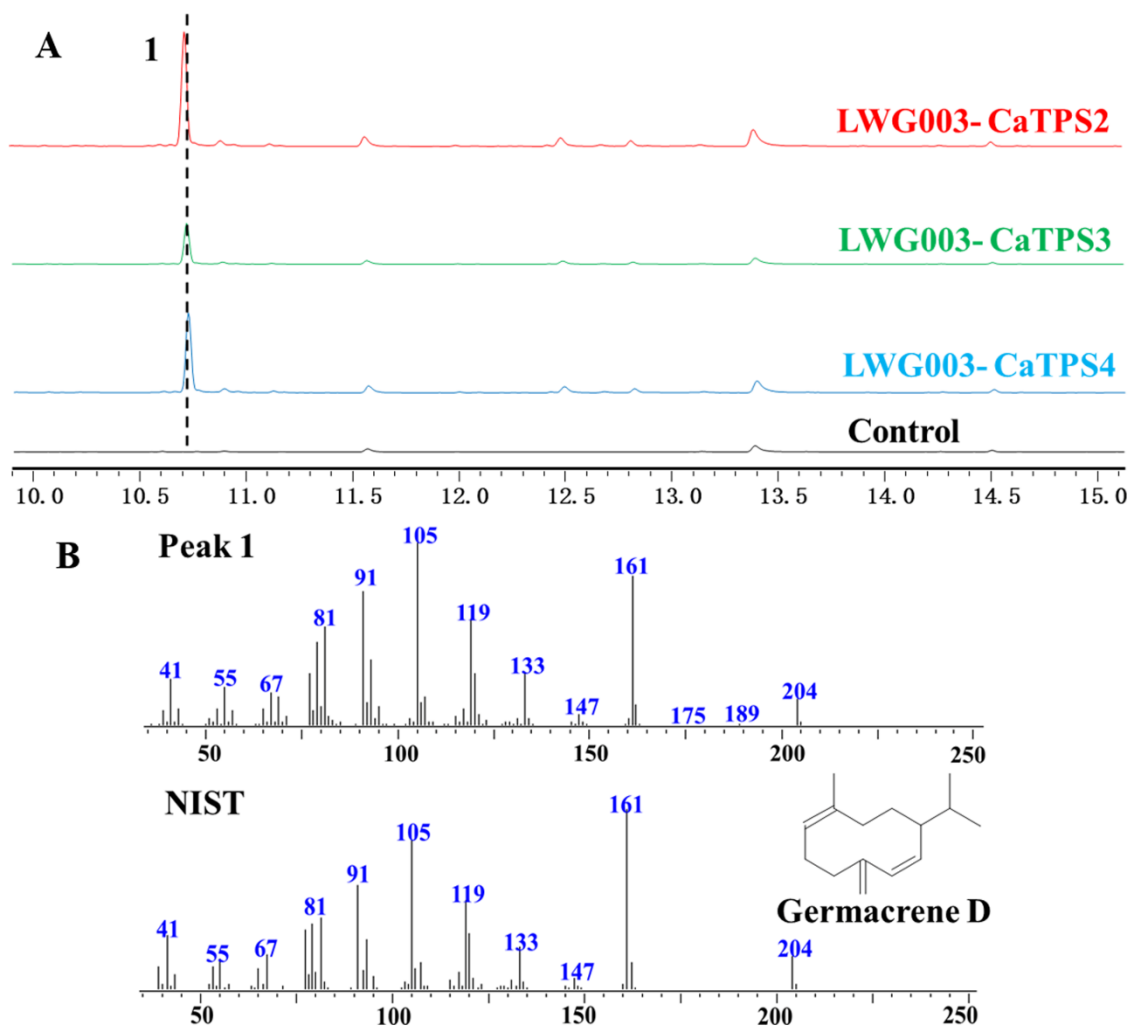

**Figure S1.** GC-MS analysis of assay products for *CaTPSs* in engineered yeast. (A) GC traces of the fermentation products of LWG003-*CaTPS2*, LWG003-*CaTPS3*, LWG003-*CaTPS4*, and empty vector as control. (B) Mass spectra comparison of the peaks with the compounds stored in the NIST17 library.

medium/long-chain-length  
prenyl pyrophosphate synthase

SaSQS2

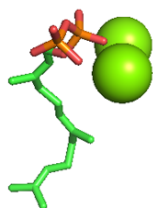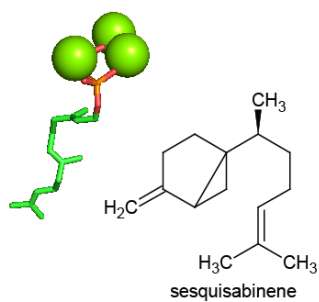

TEAS

XC1

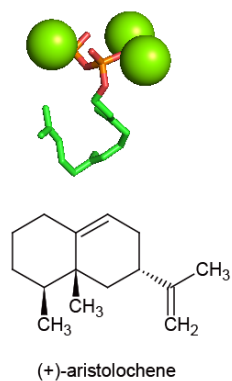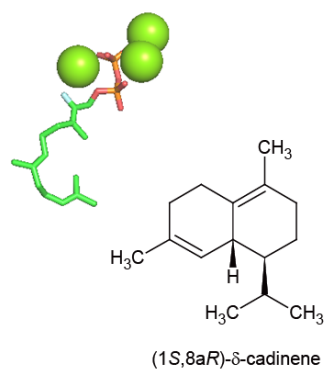

**Figure S2.** The corresponding shapes of FPP in STSs active site cavity with different cyclization pattern. The medium/long-chain length prenyl pyrophosphate synthase presents the acyclic STSs, SaSQS2 presents the C6-C1 cyclized STSs; TEAS and XC1 present C10-C1 cyclized STSs.

**Table S1.** Information of functional sesquiterpene TPSs in non-seed plants

| Species                          | Genus                                                                              | Gene name                                                                                                                                                    | GenBank                                                                                                              | Products                                                                                                                                                                 | Function                                                                                                                                       |
|----------------------------------|------------------------------------------------------------------------------------|--------------------------------------------------------------------------------------------------------------------------------------------------------------|----------------------------------------------------------------------------------------------------------------------|--------------------------------------------------------------------------------------------------------------------------------------------------------------------------|------------------------------------------------------------------------------------------------------------------------------------------------|
| <i>Myriopteris eatonii</i>       | <i>Polypodiales</i><br><i>Pteridaceae</i>                                          | Mon-GSXD-MTPSL3 [1]                                                                                                                                          | APB88779                                                                                                             | (E,E)- $\alpha$ -farnesene                                                                                                                                               | A                                                                                                                                              |
| <i>Pityrogramma trifoliata</i>   | <i>Myriopteris</i><br><i>Polypodiales</i><br><i>Pteridaceae</i>                    | Mon-UJTT-MTPSL4 [1]                                                                                                                                          | APB88780                                                                                                             | protoillud-6-ene                                                                                                                                                         | U, T                                                                                                                                           |
| <i>Woodsia scopulina</i>         | <i>Pityrogramma</i><br><i>Polypodiales</i><br><i>Woodsiaceae</i><br><i>Woodsia</i> | Mon-YJJY-MTPSL1 [1]                                                                                                                                          | APB88781                                                                                                             | protoillud-6-ene                                                                                                                                                         | U                                                                                                                                              |
| <i>Selaginella Moellendorffi</i> | <i>Selaginellales</i><br><i>Selaginellaceae</i><br><i>Selaginella</i>              | SmMTPSL1 [2]<br>SmMTPSL17 [2]<br>SmMTPSL22 [2]<br>SmMTPSL26 [2]<br>Hon-ApMTPSL7 [1]                                                                          | J9R1J8<br>D8RLD3<br>D8RNZ9<br>J9QS25<br>APB88778                                                                     | -<br>-<br>(E)-nerolidol<br>2-epi-(E)- $\beta$ -caryophyllene<br>$\beta$ -acoradiene                                                                                      | L<br>M1<br>A, U, B(GPP)<br>C(1,11), M1<br>C(N1,6), M2, B(GPP)                                                                                  |
| <i>Anthoceros punctatus</i>      | <i>Anthoceros</i>                                                                  | ApMTPSL1 [3]<br>ApMTPSL2 [3]<br>ApMTPSL3 [3]<br>ApMTPSL4 [3]<br>ApMTPSL6 [3]<br>AaMTPSL1 [3]<br>AaMTPSL3 [3]<br>AaMTPSL4 [3]<br>AaMTPSL6 [3]<br>AaMTPSL7 [3] | AVL27452<br>AVL27462<br>AVL27453<br>AVL27454<br>AVL27451<br>AVL27456<br>AVL27457<br>AVL27458<br>AVL27460<br>AVL27461 | bicyclogermacrene<br>$\gamma$ -cuprenene<br>$\delta$ -selinene<br>-<br>$\beta$ -bisabolene<br>-<br>$\delta$ -selinene<br>-<br>$\beta$ -bisabolene<br>$\beta$ -acoradiene | C(1,10), M1<br>M1, B(GGPP)<br>C(1,10)<br>C(N1,6)<br>C(N1,6), B(GGPP)<br>M2<br>C(1,10)<br>C(N1,6), L<br>C(N1,6), B(GGPP)<br>C(N1,6), M2, B(GPP) |
| <i>Anthoceros agrestis</i>       | <i>Anthocerotales</i><br><i>Anthocerotaceae</i><br><i>Anthoceros</i>               |                                                                                                                                                              |                                                                                                                      |                                                                                                                                                                          |                                                                                                                                                |
| <i>Pseudotaxiphyllum elegans</i> | <i>Hypnales</i><br><i>Hypnaceae</i><br><i>Pseudotaxiphyllum</i><br><i>Hypnales</i> | Mos-QKQO-MTPSL3 [1]                                                                                                                                          | APB88776                                                                                                             | $\gamma$ -curcumene                                                                                                                                                      | C(N1,6), M2                                                                                                                                    |
| <i>Anomodon rostratus</i>        | <i>Anomodontaceae</i><br><i>Anomodon</i><br><i>Jungermanniales</i>                 | Mos-VBMM-MTPSL3 [1]<br>Liv-IRBN-MTPSL2 [1]                                                                                                                   | APB88777<br>APB88773                                                                                                 | $\beta$ -bisabolene<br>bicyclogermacrene                                                                                                                                 | C(N1,6), M1, B(GGPP)<br>C(1,10), B(GPP)                                                                                                        |
| <i>Scapania nemorea</i>          | <i>Scapaniaceae</i><br><i>Scapania</i>                                             | Liv-IRBN-MTPSL4 [1]                                                                                                                                          | APB88774                                                                                                             | dactylol                                                                                                                                                                 | M1                                                                                                                                             |

| Species                      | Genus                 | Gene name    | GenBank  | Products                       | Function     |
|------------------------------|-----------------------|--------------|----------|--------------------------------|--------------|
| <i>Marchantia polymorpha</i> | <i>Marchantiales</i>  | MpMTPSL4 [4] | APP91789 | 5-hydroxy- $\alpha$ -gurjunene | C(N1,10), M1 |
|                              |                       | MpMTPSL3 [4] | APP91788 | -                              | B(GPP)       |
|                              | <i>Marchantiaceae</i> | MpMTPSL5 [4] | APP91790 | -                              | U            |
|                              | <i>Marchantia</i>     | MpMTPSL7 [4] | APP91792 | -                              | M1           |
|                              |                       | MpMTPSL9 [4] | APP91797 | -                              | M2           |

Note: C indicates that the main product is cyclized, N indicates that FPP is first isomerized to form NPP and then cyclized, and the number is cyclization mode; A indicates that the main product is acyclized; U indicates single product; M1 indicates multiple products (the number of products is more than 5, and the proportion of main products is less than 50%); M2 indicates that the number of by-products is more than 5, and the proportion of each by-product is less than 1%. B indicates a bifunctional TPS, with other acceptable substrates in brackets; T indicates a tri functional TPS, with GPP, FPP and GGPP as substrates; M indicates monoterpene synthase activity in vivo; D indicates diterpene synthase activity in vivo; L is low TPS activity.

**Table S2.** Information of functional sesquiterpene TPSs in gymnosperms.

| Species                                         | Genus               | Gene name          | GenBank  | Products                              | Function            |
|-------------------------------------------------|---------------------|--------------------|----------|---------------------------------------|---------------------|
| <i>Ginkgo biloba</i>                            | <i>Ginkgoales</i>   | GbTPS1 [5]         | AIU94289 | (E,E)-farnesol                        | A                   |
|                                                 | <i>Ginkgoaceae</i>  | GbTPS2 [5]         | AIU94290 | $\alpha$ -bisabolene                  | C(N1-6)             |
|                                                 | <i>Ginkgo</i>       | TcTPS1 [6]         | QGN65607 | zingiberene                           | C(N1-6), M2, B(GPP) |
|                                                 |                     | TcTPS2 [6]         | QGN65608 | -                                     | C(N1,6), B(GPP)     |
| <i>Taiwania cryptomerioides</i>                 |                     | TcTPS3 [6]         | QGN65609 | $\delta$ -cadinene                    | C(N1-10)            |
|                                                 |                     | TcTPS4 [6]         | QGN65610 | germacradien-4-ol                     | C(N1-10), U         |
|                                                 | <i>Cupressales</i>  | TcTPS5 [6]         | QGN65611 | longifolene                           | C(N1-11), M2        |
|                                                 | <i>Cupressaceae</i> | TcTPS6 [6]         | QGN65612 | cedrol                                | C(N1-6), M2, B(GPP) |
|                                                 | <i>Taiwania</i>     | TcTPS7 [6]         | QGN65613 | murrolene or cadinene                 | C(N1-10), U, B(GPP) |
|                                                 |                     | TcTPS8 [6]         | QGN65614 | germacrene D                          | C(N1-10)            |
|                                                 |                     | TcTPS9 [6]         | QGN65615 | caryophyllene                         | C(1,11)             |
|                                                 |                     | TcTPS12 [6]        | QHZ00915 | $\delta$ -cadinene/ germacrene-4-ol   | C(N1-10), L         |
|                                                 | <i>Cupressales</i>  | CfCadS [7]         | AFJ23663 | $\beta$ -cadinene                     | C(N1-10)            |
|                                                 | <i>Cupressaceae</i> |                    |          |                                       |                     |
| <i>Pinus sylvestris</i>                         | <i>Pinus</i>        | Pt5 [9]            | Q84KL5   | $\alpha$ -farnesene                   | A, U                |
|                                                 | <i>Pinaceae</i>     | Ag4 [10]           | O64404   | $\delta$ -selinene/(E,E)-Germacrene B | C(1,10), M1, B(GPP) |
|                                                 | <i>Pinus</i>        | Ag5 [10]           | O64405   | $\gamma$ -Humulene                    | C(1,11), M1, B(GPP) |
| <i>Pinus taeda</i>                              | <i>Pinus</i>        | Ag1 [11]           | O81086   | (E)- $\alpha$ -bisabolene             | C(N1-6), U, B(GPP)  |
| <i>Abies grandis</i>                            | <i>Pinaceae</i>     | PmeTPS3 [12]       | AAX07266 | (Z)- $\gamma$ -bisabolene             | C(N1-6), U          |
|                                                 | <i>Abies</i>        | PmeTPS4 [12]       | AAX07265 | (E)- $\beta$ -farnesene               | A, U                |
|                                                 | <i>Pseudotsuga</i>  | PgTPS-Lonp [13]    | ADZ45516 | $\alpha$ -longipinene                 | C(N1-11),M1         |
| <i>Picea sitchensis</i>                         |                     | PgTPS-Hum [13]     | ADZ45513 | $\alpha$ -humulene                    | C(1-11),M1          |
| <i>Picea glauca</i>                             | <i>Pinaceae</i>     | PgTPS-Far/Oci [13] | ADZ45514 | (E,E)- $\alpha$ -farnesene            | A, U, B(GPP)        |
| <i>P. glauca</i> $\times$ <i>P. engelmannii</i> | <i>Pinaceae</i>     | PgTPS-Lonf [13]    | ADZ45515 | Longifolene                           | C(N1-11)            |
|                                                 | <i>Picea</i>        | PaTPS-Far [14]     | AAS47697 | E,E- $\alpha$ -Farnesene              | A, U                |
|                                                 |                     | PaTPS-Lon [14]     | AAS47695 | Longifolene                           | C(N1-11), M2        |
| <i>Picea abies</i>                              |                     | PaTPS-Bis [14]     | AAS47689 | E- $\alpha$ -Bisabolene               | C(N1-6), U          |

Note as Table S1.

**Table S3.** Information of functional sesquiterpene TPSs in angiosperms.

| Species                     | Genus        | Gene name         | GenBank  | Products                               | Function             |
|-----------------------------|--------------|-------------------|----------|----------------------------------------|----------------------|
| <i>Magnolia grandiflora</i> | Magnoliales  | Mg25 [15]         | ACC66281 | $\beta$ -cubebene/ $\alpha$ -muurolene | C(N1,10), M1         |
|                             | Magnoliaceae | Mg17 [15]         | ACC66282 | (E)- $\alpha$ -bisabolene              | C(N1,6), M1, M       |
| <i>Cananga odorata</i>      | Magnolia     | CoTPS2 [16]       | -        | $\beta$ -cubebene                      | C(N1,10)             |
|                             | Magnoliales  |                   |          | $\alpha$ -bergamotene                  | C(N1,6)              |
|                             | Annonaceae   | CoTPS3 [16]       | -        |                                        |                      |
| <i>Laurus nobilis</i>       | Cananga      | LnTPS2 [17]       | AKQ19358 | $\delta$ -cadinene/ $\gamma$ -cadinene | C(N1,10), M1         |
|                             | Laurales     |                   |          |                                        |                      |
|                             | Lauraceae    | LnTPS3 [17]       | AKQ19359 | (E,E)-nerolidol                        | A, D                 |
| <i>Piper Nigrum</i>         | Laurus       | PnTPS1/PnCPS      | ARB08605 | caryophyllene                          | C(1,11)              |
|                             | Piperales    | PnTPS2/PnCDS [18] | ARB08606 | $\delta$ -cadinol                      | C(N1,10)             |
|                             | Piper        |                   | AVY53326 | Germacrene D                           | C(N1,10)/(1,10)      |
|                             | Liliales     | LoTPS2 [19]       | AMT81306 | (E, E)- $\alpha$ -farnesene            | A, U                 |
| <i>Lilium 'Siberia'</i>     | Liliaceae    | LoTPS4 [19]       | -        | trans- $\alpha$ -bergamotene           | C(N1,6), M           |
|                             | Lilium       |                   |          |                                        |                      |
|                             | Asparagales  |                   |          |                                        |                      |
| <i>Vanda Mimi Palmer</i>    | Orchidaceae  | VMPSTS [20]       | ABX57720 | germacrene D                           | C(N1,10)/(1,10)      |
|                             | Vanda        |                   |          |                                        |                      |
| <i>Freesia x hybrida</i>    | Asparagales  | FhTPS4 [21]       | -        | Nerolidol                              | A, U, M              |
|                             | Iridaceae    | FhTPS6 [21]       | -        | Selinene                               | C(1,10), B(GPP)      |
|                             |              | FhTPS7 [21]       | -        | Copaene                                | C(N1,10), M1, B(GPP) |
|                             | Freesia      | FhTPS8 [21]       | -        | $\alpha$ -Gurjunene                    | C(N1,10), M1         |
|                             |              | OsTPS3 [22]       | ABJ16553 | (E)- $\beta$ -caryophyllene            | C(1,11), M2          |
| <i>Oryza sativa</i>         |              | OsTPS13 [22]      | ABJ16554 | (E,E)-farnesol                         | A                    |
|                             |              | OsLIS [23]        | ACF05530 | nerolidol                              | A, U, M              |
|                             |              | Os08g07100 [23]   | ACF05529 | zingiberene                            | C(N1,6), M1, B(GPP)  |
|                             |              | OsTPS1 [23]       | ACF05531 | (E)- $\beta$ -caryophyllene            | C(1,11)              |
| <i>Oryza nivara</i>         | Poales       | OnTPS1 [24]       | AIJ00875 | (E)- $\beta$ -caryophyllene            | C(1,11)              |
| <i>Oryza officinalis</i>    | Poaceae      | OoTPS1 [24]       | AIJ00877 | (E)- $\beta$ -caryophyllene            | C(1,11)              |
|                             | Oryza        |                   |          | $\beta$ -elemene                       | C(1,11)              |
| <i>Oryza glaberrima</i>     |              | OgTPS1[24]        | AIJ00879 | (E)- $\beta$ -caryophyllene            | C(1,11)              |
| <i>Oryza barthii</i>        |              | ObTPS1[24]        | AIJ00878 | (E)- $\beta$ -caryophyllene            | C(1,11)              |
| <i>Oryza rufipogon</i>      |              | OrTPS1 [24]       | AIJ00876 | Germacrene D                           | C(1,10)              |
| <i>Oryza glumaepatula</i>   |              | OgluTPS1[24]      | AIJ00880 | (E)- $\beta$ -caryophyllene            | C(1,11)              |

| Species                        | Genus                | Gene name     | GenBank  | Products                    | Function        |
|--------------------------------|----------------------|---------------|----------|-----------------------------|-----------------|
| <i>Triticum aestivum</i>       | Poales               | TaPS [25]     | -        | $\beta$ -patchoulene        | C(1,10)         |
|                                | Poaceae              |               |          |                             |                 |
| <i>Eremochloa ophiuroides</i>  | <i>Triticum</i>      | EoMUS [26]    | -        | $\alpha$ -muurolene         | C(1,10)         |
|                                | Poales               |               |          |                             |                 |
|                                | Poaceae              |               |          |                             |                 |
|                                | <i>Eremochloa</i>    |               |          |                             |                 |
|                                |                      |               |          |                             |                 |
|                                |                      |               |          |                             |                 |
|                                |                      |               |          |                             |                 |
|                                |                      |               |          |                             |                 |
|                                |                      |               |          |                             |                 |
|                                |                      |               |          |                             |                 |
|                                |                      |               |          |                             |                 |
|                                |                      |               |          |                             |                 |
|                                |                      |               |          |                             |                 |
|                                |                      |               |          |                             |                 |
|                                |                      |               |          |                             |                 |
|                                |                      |               |          |                             |                 |
|                                |                      |               |          |                             |                 |
|                                |                      |               |          |                             |                 |
|                                |                      |               |          |                             |                 |
| <i>Panicum virgatum</i>        | Poales               | PvTPS01 [27]  | -        | cycloisosativene            | -               |
|                                | Poaceae              | PvTPS02 [27]  | -        | (E)- $\beta$ -farnesene     | A, M2           |
|                                | <i>Panicum</i>       | PvTPS03 [27]  | -        | (E)- $\gamma$ -bisabolene   | C(N1,6), M2     |
|                                |                      | PvTPS05 [27]  | -        | $\alpha$ -selinene          | C(1,10), M1     |
|                                |                      | PvTPS06 [27]  | -        | $\delta$ -cadinene          | C(N1,10), M2    |
|                                |                      | PvTPS09 [27]  | -        | $\delta$ -cadinene          | C(N1,10), M1    |
|                                |                      | PvTPS10 [27]  | -        | $\alpha$ -patchoulene       | C(1,10), M1     |
|                                |                      | PvTPS11 [27]  | -        | (E)- $\beta$ -caryophyllene | C(1,11)         |
|                                |                      | PvTPS14 [27]  | -        | (E)- $\beta$ -caryophyllene | C(1,11), M1     |
|                                |                      | PvTPS16 [27]  | -        | (E)- $\beta$ -farnesene     | A, U            |
|                                |                      | PvTPS17 [27]  | -        | $\beta$ -bisabolene         | C(N1,6)         |
|                                |                      | PvTPS19 [27]  | -        | (E)- $\beta$ -caryophyllene | C(1,11)         |
|                                |                      | PvTPS20 [27]  | -        | $\beta$ -bisabolene         | C(N1,6), M1     |
|                                |                      | PvTPS50 [27]  | -        | copaebe                     | C(N1,10), M1    |
|                                |                      | PvTPS55 [27]  | -        | Germacrene D                | C(1,10)/(N1,10) |
| <i>Phyllostachys edulis</i>    |                      | PvTPS69 [27]  | -        | (E)- $\beta$ -farnesene     | A               |
|                                |                      | PvTPS79 [27]  | -        | $\gamma$ -curcumene         | C(N1,6), M1     |
|                                |                      | PvTPS83 [27]  | -        | (E)- $\gamma$ -bisabolene   | C(N1,6)         |
|                                |                      | PvTPS94 [27]  | -        | $\alpha$ -santalene         | C(N1,6)         |
|                                |                      | PvTPS109 [27] | -        | (E)- $\beta$ -farnesene     | A, U            |
| <i>Chrysopogon zizanioides</i> | Poales               | MoTPS2 [28]   | AJP67536 | (E, E)-farnesol             | A, U            |
|                                | Poaceae              | MoTPS6 [28]   | AJP67535 | (E)-nerolidol               | A, U            |
|                                | <i>Phyllostachys</i> |               |          |                             |                 |
| <i>Ananas comosus</i>          | Poales               | CzZIZS [29]   | AJQ30127 | (+) -zizaene                | C(N1,6)         |
|                                | Poaceae              |               |          |                             |                 |
|                                | <i>Chrysopogon</i>   |               |          |                             |                 |
| <i>Ananas comosus</i>          | Poales               | AcoTPS15 [30] | -        | clovene                     | U, B(GPP)       |
|                                | Bromeliaceae         |               |          |                             |                 |
|                                | <i>Ananas</i>        |               |          |                             |                 |

| Species                    | Genus                                             | Gene name        | GenBank      | Products                                               | Function            |
|----------------------------|---------------------------------------------------|------------------|--------------|--------------------------------------------------------|---------------------|
| <i>Zea mays</i>            | <i>Poales</i><br><i>Poaceae</i><br><i>Zea</i>     | ZmTPS23 [31]     | B2C4D0       | (E)- $\beta$ -caryophyllene                            | C(1,11)             |
|                            |                                                   | ZmpTPS23 [31]    | ABY79213     | (E)- $\beta$ -caryophyllene                            | C(1,11)             |
|                            |                                                   | ZmmTPS23 [31]    | ABY79212     | (E)- $\beta$ -caryophyllene                            | C(1,11)             |
|                            |                                                   | ZmhTPS23 [31]    | ABY79210     | (E)- $\beta$ -caryophyllene                            | C(1,11)             |
|                            |                                                   | ZmTPS10 [32]     | AAX99146     | (E)- $\alpha$ -bergamotene,<br>(E)- $\beta$ -farnesene | C(N1,6)             |
|                            |                                                   | ZmmTPS10 [32]    | ACT37403     | (E)- $\alpha$ -bergamotene,<br>(E)- $\beta$ -farnesene | C(N1,6)             |
|                            |                                                   | ZmhTPS10 [32]    | ACT37404     | (E)- $\alpha$ -bergamotene,<br>(E)- $\beta$ -farnesene | C(N1,6)             |
|                            |                                                   | ZmTPS1 [33]      | AAO18435     | (E,E)-farnesol                                         | A, B(GPP)           |
|                            |                                                   | ZmTPS4-B73 [34]  | AAS88571     | 7-epi-sesquithujene,<br>(S)- $\beta$ -bisabolene       | C(N1,6), M1, B(GPP) |
|                            |                                                   | ZmTPS5-Del1 [34] | AAS88574     | Sesquithujene                                          | C(N1,6), M1, B(GPP) |
|                            |                                                   | ZmTPS6 [35]      | AAS88576     | $\beta$ -macrocarpene                                  | C(N1,6), B(GPP)     |
|                            |                                                   | ZmTPS11 [35]     | ACF58240     | $\beta$ -macrocarpene                                  | C(N1,6), B(GPP)     |
|                            |                                                   | ZmTPS7 [36]      | AAS88577     | $\tau$ -Cadinol                                        | C(N1,10), M2        |
|                            |                                                   | ZmTPS8 [37]      | Q29VN3       | germacrene D                                           | C(1,10)/(N1,10), M1 |
|                            |                                                   | ZmTPS2 [38]      | NP_001105854 | (E)-nerolidol                                          | A, U, T             |
|                            |                                                   | ZmTPS21 [39]     | ATI25530     | $\beta$ -selinene                                      | C(1,10)             |
|                            |                                                   | ZmEDS [40]       | A0A1D6EFT8   | eudesmane-2, 11-diol                                   | C(1,10), M1         |
| <i>Zea diploperennis</i>   |                                                   | ZdTPS23 [31]     | ABY79209     | (E)- $\beta$ -caryophyllene                            | C(1,11)             |
|                            |                                                   | ZdTPS10 [32]     | ACT37405     | (E)- $\beta$ -farnesene                                | A                   |
| <i>Zea perennis</i>        |                                                   | ZpTPS23 [31]     | ABY79214     | (E)- $\beta$ -caryophyllene                            | C(1,11)             |
|                            |                                                   | ZpTPS10 [32]     | ACT37406     | (E)- $\beta$ -farnesene                                | A                   |
| <i>Zea luxurians</i>       |                                                   | ZITPS23 [31]     | ABY79211     | (E)- $\beta$ -caryophyllene                            | C(1,11)             |
| <i>Sorghum bicolor</i>     | <i>Poales</i><br><i>Poaceae</i><br><i>Sorghum</i> | SbTPS1 [41]      | C5YHH7       | Zingiberene                                            | C(N1,6), M2, B(GPP) |
|                            |                                                   | SbTPS2 [41]      | C5YHI2       | $\beta$ -sesquiphellandrene                            | C(N1,6), M2, B(GPP) |
|                            |                                                   | SbTPS1 [41]      | C5YHH7       | Zingiberene                                            | C(N1,6), M2, B(GPP) |
|                            |                                                   | SbTPS2 [41]      | C5YHI2       | $\beta$ -sesquiphellandrene                            | C(N1,6), M2, B(GPP) |
|                            |                                                   | SbTPS3 [41]      | XP_021320232 | (E)- $\beta$ -farnesene                                | A, M2               |
|                            |                                                   | SbTPS4 [41]      | -            | (E)- $\beta$ -caryophyllene                            | C(1,11), M2         |
| <i>Zingiber zerumbet</i>   | <i>Zingiberales</i><br><i>Zingiberaceae</i>       | SbTPS5 [41]      | -            | (Z)- $\gamma$ -bisabolene                              | C(N1,6), M1         |
|                            |                                                   | ZSS1 [42]        | BAG12020     | $\alpha$ -humulene                                     | C(1,11)             |
|                            |                                                   | ZSS2 [43]        | B1B1U4       | $\beta$ -eudesmol                                      | C(1,10)             |
| <i>Zingiber officinale</i> | <i>Zingiber</i>                                   | ZoTPS1 [44]      | BAI67934     | (S)- $\beta$ -bisabolene                               | C(N1,6), U          |



| Species                      | Genus                                                            | Gene name     | GenBank  | Products                      | Function             |
|------------------------------|------------------------------------------------------------------|---------------|----------|-------------------------------|----------------------|
| <i>Zingiber officinale</i>   | <i>Zingiberales</i><br><i>Zingiberaceae</i><br><i>Zingiber</i>   | ZoGED [45]    | AAX40665 | (+)-germacrene D              | C(1,10), M2          |
|                              |                                                                  | MT08 [46]     | -        | (Z)- $\beta$ -farnesene       | A, U, M              |
|                              |                                                                  | MT06/06A [46] | -        | (E)-nerolidol                 | A, M1, M             |
|                              |                                                                  | MT02A [46]    | -        | epi- $\alpha$ -bisabolol      | C(N1,6), M           |
|                              |                                                                  | ST01 [46]     | -        | $\beta$ -selinene             | C(1,10), M2          |
|                              |                                                                  | ST05 [46]     | -        | $\alpha$ -humulene            | C(1,11)              |
|                              |                                                                  | ST05A [46]    | -        | $\alpha$ -humulene            | C(1,11)              |
|                              |                                                                  | ST07 [46]     | -        | (-)-caryolan-1-ol             | C(1,11)              |
|                              |                                                                  | ST07A [46]    | -        | (-)-caryolan-1-ol             | C(1,11)              |
|                              |                                                                  | CITPS16 [47]  | -        | $\beta$ -sesquiphellandrene   | C(N1,6)              |
|                              |                                                                  | CITPS15 [47]  | -        | $\gamma$ -eudesmol            | C(1,10), M1          |
|                              |                                                                  | CITPS1 [47]   | -        | -                             | C(N1,6), M2          |
|                              |                                                                  | ST00A/B [46]  | -        | (-)- $\alpha$ -zingiberene    | C(N1,6), M2, B(GPP)  |
|                              |                                                                  | MT00 [46]     | -        | (E)-nerolidol                 | A, U, M              |
| <i>Curcuma longa</i>         | <i>Zingiberales</i><br><i>Zingiberaceae</i><br><i>Curcuma</i>    | MT17A2 [46]   | -        | cis- $\alpha$ -bisabolene     | C(N1,6), M1, M       |
|                              |                                                                  | ST02A4 [46]   | -        | (-)-neointermedeol            | C(1,10), M2          |
|                              |                                                                  | ST02B [46]    | -        | $\alpha$ -elemol              | C(1,10), M2          |
|                              |                                                                  | ST02C [46]    | -        | $\beta$ -elemene              | C(1,10), M2          |
|                              |                                                                  | ST03 [46]     | -        | $\gamma$ -amorphene           | C(N1,10)             |
|                              |                                                                  | CzTPS1a [48]  | BBE32333 | $\beta$ -eudesmol             | C(1,10)              |
| <i>Curcuma zedoaria</i>      |                                                                  | CzTps2 [48]   | BBE32340 | germacrene B                  | C(1,10), U           |
|                              |                                                                  | LfTPS01 [49]  | AIO10964 | hedycaryol                    | C(1,10)              |
|                              |                                                                  | LfTPS02 [49]  | AMD82310 | $\alpha$ -selinene            | C(1,10)              |
|                              |                                                                  | LfTPS03 [49]  | AIO10966 | trans- $\beta$ -caryophyllene | C(1,11)              |
|                              |                                                                  | LfTPS04 [49]  | AMD82312 | $\delta$ -cadinene            | C(N1,10), M1         |
| <i>Liquidambar formosana</i> | <i>Saxifragales</i><br><i>Altingiaceae</i><br><i>Liquidambar</i> | LfTPS05 [49]  | AIO10968 | nerolidol                     | A, U, B(GPP)         |
|                              |                                                                  | MtTPS1 [50]   | AAV36464 | $\beta$ -caryophyllene        | C(1,11), B(GPP)      |
|                              |                                                                  | MtTPS3 [50]   | AAV36466 | (3S) -(E)-nerolidol           | A, U, T              |
|                              |                                                                  | MtTPS5 [50]   | ABB01625 | (-)-cubebol                   | C(N1,10), M1, B(GPP) |
|                              |                                                                  | MtTPS10 [51]  | -        | himachalol                    | C(N1,11), M2         |
| <i>Medicago Truncatula</i>   | <i>Fabales</i><br><i>Fabaceae</i><br><i>Medicago</i>             | PITPS2 [52]   | AGS83387 | (E)-nerolidol                 | A, U, T              |
|                              |                                                                  | PITPS3 [53]   | ARG42161 | (E)-nerolidol                 | A, U, B(GPP)         |
|                              |                                                                  | PITPS4 [53]   | ARG42162 | (E)-nerolidol                 | A, U, T              |

| Species                  | Genus                | Gene name                 | GenBank      | Products                      | Function             |
|--------------------------|----------------------|---------------------------|--------------|-------------------------------|----------------------|
| <i>Sindora glabra</i>    | <i>Fabales</i>       | SgSTPS1 [54]              | -            | $\beta$ -caryophyllene        | C(1,11)              |
|                          | <i>Fabaceae</i>      | SgSTPS2 [54]              | -            | germacrene D                  | C(N1,10), M1, B(GPP) |
|                          | <i>Sindora</i>       |                           |              |                               |                      |
|                          |                      |                           |              |                               |                      |
|                          |                      | CsTPS4FN [55]             | ARE72260     | Alloaromadendrene             | C(1,10), B(GPP)      |
| <i>Cannabis sativa</i>   |                      | CsTPS5FN [55]             | ARE72256     | farnesene                     | A, U, B(GPP)         |
|                          |                      | CsTPS7FN [55]             | ARE72250     | $\delta$ -selinene            | C(1,10), M1, B(GPP)  |
|                          | <i>Rosales</i>       | CsTPS8FN [55]             | ARE72252     | $\gamma$ -eudesmol, valencene | C(1,10), M1, B(GPP)  |
|                          | <i>Cannabaceae</i>   | CsTPS9FN [55]             | ARE72251     | $\beta$ -caryophyllene        | C(1,11)              |
|                          | <i>Cannabis</i>      | CsTPS18VF [56]            | QCY41292     | (E)-nerolidol                 | A, U, B(GPP)         |
|                          |                      | CsTPS19BL [56]            | QCY41291     | (E)-nerolidol                 | A, U, B(GPP)         |
|                          |                      | CsTPS16CC [56]            | QCQ18307     | GermacreneB                   | C(1,10), U           |
|                          |                      | CsTPS20CT [56]            | QCY41290     | Hedycaryol                    | C(1,10), U           |
|                          | <i>Rosales</i>       | HISTS1 [57]               | ACI32639     | $\alpha$ -humulene            | C(1,11)              |
|                          | <i>Cannabaceae</i>   | HISTS2 [57]               | ACI32640     | germacrene A                  | C(1,10)              |
| <i>Humulus lupulus</i>   | <i>Humulus</i>       |                           |              |                               |                      |
| <i>Malus domestica</i>   |                      | MdAFS [58]                | AAO22848     | (E,E)- $\alpha$ -farnesene    | A                    |
|                          | <i>Rosales</i>       | MdCAR-RG1 [58]            | AGB14624     | (E)- $\beta$ -caryophyllene   | C(1,11)              |
|                          | <i>Rosaceae</i>      | MdGDS-RG1 [58]            | AGB14625     | (-)-Germacrene D              | C(1,10)/(N1,10)      |
|                          | <i>Malus</i>         | MdNES-RG1 [58]            | AGB14626     | (E)-nerolidol                 | A, U, L              |
|                          |                      | MdLIS-RG1 [58]            | AGB14629     | nerolidol                     | A, U, M              |
| <i>Rosa chinensis</i>    | <i>Rosales</i>       | RcLIN-NERS1 [59]          | AVR48790     | nerolidol                     | A, B(GPP)            |
| <i>Rosa hybrida</i>      | <i>Rosaceae</i>      | RcLIN-NERS2 [59]          | AVR48791     | nerolidol                     | A, M                 |
|                          | <i>Rosa</i>          | FC0592 [60]               | -            | Germacrene D                  | C(1,10)/(N1,10), U   |
| <i>Fragaria ananassa</i> | <i>Rosales</i>       | FaNES1 [61]               | P0CV94       | (3S)-E-nerolidol              | A, U, B(GPP)         |
|                          | <i>Rosaceae</i>      |                           |              |                               |                      |
| <i>Prunus dulcis</i>     | <i>Fragaria</i>      | PdTPS2 [62]               | QEE82240     | $\alpha$ -cis-bergamotene     | C(N1,6), M1, B(GPP)  |
|                          | <i>Rosales</i>       | PdTPS4 [62]               | QEE82242     | $\alpha$ -cis-bergamotene     | C(N1,6), M1, B(GPP)  |
|                          | <i>Rosaceae</i>      | PdTPS6 [62]               | QEE82244     | E- $\alpha$ -farnesene        | A, B(GPP)            |
|                          | <i>Amygdalus</i>     | PdTPS7 [62]               | QEE82245     | E-nerolidol                   | A, U, B(GPP)         |
|                          |                      | CmTPS <sub>NY</sub> [63]  | NP_001284382 | $\delta$ -cadinene            | C(N1,10), M2         |
| <i>Cucumis melo</i>      | <i>Cucurbitales</i>  | CmTPSD <sub>ul</sub> [63] | NP_001284384 | $\alpha$ -farnesene           | A                    |
| <i>Cucumis sativus</i>   | <i>Cucurbitaceae</i> | CsaFS [64]                | AAU05951     | (E,E)- $\alpha$ -farnesene    | A, U, B(GPP)         |
|                          | <i>Cucumis</i>       | CsbCS [64]                | AAU05952     | (E)- $\beta$ -caryophyllene   | C(1,11), U           |

| Species                                         | Genus                                                            | Gene name      | GenBank    | Products                    | Function            |
|-------------------------------------------------|------------------------------------------------------------------|----------------|------------|-----------------------------|---------------------|
| <i>Tripterygium wilfordii</i>                   | <i>Celastrales</i><br><i>Celastraceae</i><br><i>Tripterygium</i> | TwCS [65]      | AWV55521   | Cryptomeridiol              | C(1,10), B(GPP)     |
|                                                 |                                                                  | TwTPS12 [66]   | APD77393   | Elemol                      | C(1,10)             |
|                                                 |                                                                  | TwTPS13 [66]   | APD77394   | Torreyol                    | C(N1,10)            |
|                                                 |                                                                  | TwTPS20 [66]   | ANO43017   | Acorenol                    | C(N1,6), L          |
|                                                 |                                                                  | TwTPS22 [66]   | ANO43012   | Farnesene                   | A                   |
|                                                 |                                                                  | TwTPS29 [66]   | ANO43019   | Nerolidol                   | A, U                |
|                                                 |                                                                  | TwNES [67]     | AQA26342   | (E)-nerolidol               | A, U, B(GGPP)       |
|                                                 |                                                                  | TwGES1 [67]    | AQA26340   | (E)-nerolidol               | A, D, L             |
|                                                 |                                                                  | PtTPS5 [68]    | AII32469   | -                           | C(1,10)             |
|                                                 |                                                                  | PtTPS7 [68]    | A0A076GAU5 | hedycaryol                  | C(1,10)             |
| <i>Populus trichocarpa</i>                      | <i>Malpighiales</i><br><i>Salicaceae</i><br><i>Populus</i>       | PtTPS9 [68]    | AII32473   | (E)- $\beta$ -caryophyllene | C(1,11)             |
|                                                 |                                                                  | PtTPS11 [68]   | A0A076GAR6 | Germacrene A                | C(1,10)             |
|                                                 |                                                                  | PtTPS12 [68]   | AII32476   | $\gamma$ -curcumene         | C(N1,6), B(GPP)     |
|                                                 |                                                                  | PtTPS15 [68]   | AII32468   | nerolidol                   | A, U, B(GPP)        |
|                                                 |                                                                  | PtTPS1 [69]    | F8TWC9     | (-)-germacrene D            | C(N1,10), M1        |
|                                                 |                                                                  | PtTPS2 [69]    | F8TWD0     | (E,E)- $\alpha$ -farnesene  | A, B(GPP)           |
|                                                 |                                                                  | PtTPS3 [69]    | F8TWD1     | (3S)-nerolidol              | A, B(GPP)           |
|                                                 |                                                                  | PtTPS4 [69]    | F8TWD2     | (3S)-nerolidol              | A, B(GPP)           |
|                                                 |                                                                  | PtdTPS1 [70]   | Q64K29     | (-)-germacrene D            | C(1,10)/(N1,10), M2 |
|                                                 |                                                                  | RcSeTPS1 [71]  | AEQ27766   | (-)- $\alpha$ -copaene      | C(N1,10)            |
| <i>Ricinus communis</i>                         | <i>Malpighiales</i><br><i>Euphorbiaceae</i><br><i>Ricinus</i>    | RcSeTPS5 [71]  | AEQ27767   | -                           | M1                  |
|                                                 |                                                                  | RcSeTPS7 [71]  | AEQ27768   | (E, E)- $\alpha$ -farnesene | A, U                |
|                                                 |                                                                  | RcSeTPS10 [71] | AEQ27769   | -                           | C(N1,6), M1         |
|                                                 |                                                                  | RtTPS1 [72]    | AXY92166   | $\beta$ -caryophyllene      | C(1,11), B(GPP)     |
| <i>Rhodomyrtus tomentosa</i>                    | <i>Myrtales</i><br><i>Myrtaceae</i><br><i>Rhodomyrtus</i>        | RtTPS3 [72]    | AXY92168   | $\beta$ -caryophyllene      | C(1,11), B(GPP)     |
|                                                 |                                                                  |                |            |                             |                     |
| <i>Pelargonium <math>\times</math> hybridum</i> | <i>Geraniales</i><br><i>Geraniaceae</i><br><i>Pelargonium</i>    | PhEDS [73]     | AWF79083   | 10-epi- $\gamma$ -eudesmol  | C(1,10)             |
| <i>Murraya koenigii</i>                         | <i>Sapindales</i><br><i>Rutaceae</i><br><i>Murraya</i>           | MkTPS2 [74]    | AQT33225   | (E,E)- $\alpha$ -farnesene  | A, U                |
|                                                 |                                                                  |                |            |                             |                     |
| <i>Toona sinensis</i>                           | <i>Sapindales</i><br><i>Meliaceae</i><br><i>Toona</i>            | TsTPS2 [75]    | BAJ46125   | $\beta$ -elemene            | C(1,10), M2         |

| Species                      | Genus                                                      | Gene name                                                       | GenBank                | Products                        | Function                  |                     |
|------------------------------|------------------------------------------------------------|-----------------------------------------------------------------|------------------------|---------------------------------|---------------------------|---------------------|
| <i>Citrus sinensis</i>       | <i>Sapindales</i><br><i>Rutaceae</i><br><i>Citrus</i>      | CsTPS1 [76]                                                     | AAQ04608               | Valencene                       | C(1,10), U                |                     |
|                              |                                                            | CsSQS1 [77]                                                     | ATD14141               | (Z)- $\beta$ -cubebene          | C(N1,10)                  |                     |
|                              |                                                            | CsSQS2 [77]                                                     | ATD14142               | $\beta$ -cadinene               | C(N1,10), M2              |                     |
|                              |                                                            | CsSQS3 [77]                                                     | ATD14143               | $\beta$ -farnesene              | A                         |                     |
|                              |                                                            | CsSQS4 [77]                                                     | ATD14144               | Germacrene A                    | C(1,10), M1               |                     |
|                              |                                                            | CsSQS5a/b [77]                                                  | ATD14145/<br>ATD14146  | alloaromadendrene               | C(1,10), M1               |                     |
|                              |                                                            | CsSQS6a [77]                                                    | ATD14147               | $\beta$ -caryophyllene          | C(1,11), L                |                     |
|                              |                                                            | CsSQS6b [77]                                                    | ATD14148               | $\beta$ -caryophyllene          | C(1,11)                   |                     |
|                              |                                                            | CsSQS7 [77]                                                     | ATD14150               | $\beta$ -caryophyllene          | C(1,11)                   |                     |
|                              |                                                            | CuSTS4 [78]                                                     | BAP75561               | nerolidol                       | A, U, B(GPP)              |                     |
| <i>Citrus unshiu</i>         | <i>Sapindales</i><br><i>Rutaceae</i><br><i>Zanthoxylum</i> | RlemTPS4 [79]                                                   | BAP74389               | $\delta$ -elemene               | C(1,10), M2, B(GPP)       |                     |
| <i>Citrus jambhiri</i>       |                                                            | CJFS [80]                                                       | AAK54279               | (E)- $\beta$ -farnesene         | A, U                      |                     |
| <i>Citrus junos</i>          |                                                            | ZpTPS1 [81]                                                     | BBD88588               | $\beta$ -caryophyllene          | C(1,11)                   |                     |
| <i>Zanthoxylum piperitum</i> |                                                            | ZpTPS2 [81]                                                     | BBD88589               | germacrene D                    | C(1,10)/(N1,10), M2       |                     |
| <i>Arabidopsis Lyrata</i>    |                                                            | AlCarS [82]                                                     | ACN58564               | (E)- $\beta$ -caryophyllene     | C(1,11)                   |                     |
|                              |                                                            | AtTPS24 [83]                                                    | Q9LRZ6                 | (E,E)- $\alpha$ -farnesene      | A, U, L, M                |                     |
|                              |                                                            | AtTPS14 [83]                                                    | Q84UV0                 | nerolidol                       | A, U, L, M                |                     |
|                              |                                                            | AtTPS21 [83]                                                    | Q84UU4                 | (-)-(E)- $\beta$ -caryophyllene | C(1,11)                   |                     |
| <i>Arabidopsis thaliana</i>  |                                                            | <i>Brassicales</i><br><i>Brassicaceae</i><br><i>Arabidopsis</i> | AtTPS11/At5g44630 [84] | Q4KSH9                          | (+)- $\alpha$ -barbatene  | C(N1,6), M1, B(GPP) |
| <i>Aquilaria microcarpa</i>  |                                                            | <i>Malvales</i><br><i>Thymelaeaceae</i><br><i>Aquilaria</i>     | AtTPS12 [85]           | NP_001328007                    | (Z)- $\gamma$ -bisabolene | C(N1,6)             |
|                              | AtTPS13 [85]                                               |                                                                 | AEE83260               |                                 |                           |                     |
|                              | dGS-1 [86]                                                 |                                                                 | AHH25146               | $\delta$ -guaiene               | C(1,10)                   |                     |
|                              | ASS1 [87]                                                  |                                                                 | AFV99464               | $\delta$ -guaiene               | C(1,10)                   |                     |
| <i>Aquilaria sinensis</i>    | ASS2 [87]                                                  |                                                                 | AFV99465               | $\delta$ -guaiene               | C(1,10)                   |                     |
|                              | ASS3 [87]                                                  |                                                                 | AFV99466               | $\delta$ -guaiene               | C(1,10)                   |                     |
|                              | As-SesTPS [88]                                             |                                                                 | AGV40227               | Nerolidol                       | A, M2                     |                     |
|                              | AcC2 [89]                                                  |                                                                 | ACY38195               | $\delta$ -guaiene               | C(1,10)                   |                     |
| <i>Aquilaria crassna</i>     | AcC3 [89]                                                  |                                                                 | ACY38196               | $\delta$ -guaiene               | C(1,10)                   |                     |
|                              | AcC4 [89]                                                  |                                                                 | ACY38197               | $\delta$ -guaiene               | C(1,10)                   |                     |
|                              | AcHS1 [90]                                                 |                                                                 | A0A142F308             | $\alpha$ -humulene              | C(1,11)                   |                     |
|                              | AcHS2 [90]                                                 |                                                                 | A0A142F309             | $\alpha$ -humulene              | C(1,11)                   |                     |
|                              | AcHS3 [90]                                                 |                                                                 | A0A142F310             | $\alpha$ -humulene              | C(1,11)                   |                     |

| Species               | Genus                                             | Gene name           | GenBank      | Products                    | Function      |
|-----------------------|---------------------------------------------------|---------------------|--------------|-----------------------------|---------------|
| <i>Vitis vinifera</i> | <i>Vitales</i><br><i>Vitaceae</i><br><i>Vitis</i> | VvValCS [91]        | ACO36239     | (+)-valencene               | C(1,10)       |
|                       |                                                   | VvValGW [92]        | AAS66358     | (+)-valencene               | C(1,10)       |
|                       |                                                   | VvGerD [92]         | AAS66357     | (-)-germacrene D            | C(N1,10)      |
|                       |                                                   | VvGwECar1 [93]      | ADR74192     | (E)-caryophyllene           | C(1,11)       |
|                       |                                                   | VvGwECar2 [93]      | ADR74193     | (E)-caryophyllene           | C(1,11)       |
|                       |                                                   | VvGwECar3 [93]      | ADR74194     | (E)-caryophyllene           | C(1,11)       |
|                       |                                                   | VvPNECar1 [93]      | ADR74221     | (E)-caryophyllene           | C(1,11)       |
|                       |                                                   | VvPNECar2 [93]      | ADR74222     | (E)-caryophyllene           | C(1,11)       |
|                       |                                                   | VvGwGerA [93]       | ADR66821     | germacrene A                | C(1,10)       |
|                       |                                                   | VvGwaBer [93]       | ADR74195     | (E)- $\alpha$ -bergamotene  | C(N1,6)       |
|                       |                                                   | VvGwGerD [93]       | ADR74196     | germacrene D                | C(1,10)       |
|                       |                                                   | VvPNGerD [93]       | ADR74197     | germacrene D                | C(1,10)       |
|                       |                                                   | VvCSaFar [93]       | ADR74198     | (E,E)- $\alpha$ -farnesene  | A, U          |
|                       |                                                   | VvGwgCad [93]       | ADR74199     | $\gamma$ -cadinene          | C(N1,10)      |
|                       |                                                   | VvPNbCur [93]       | ADR74200     | (E)- $\gamma$ -bisabolene   | C(N1,6), M1   |
|                       |                                                   | VvPNSesq [93]       | ADR74223     | Sesquithujene               | C(N1,6), M2   |
|                       |                                                   | VvPNaZin [93]       | ADR74224     | $\alpha$ -zingiberene       | C(N1,6)       |
|                       |                                                   | VvPNSeInt [93]      | CAO39293     | selina-4,11-diene,          | C(1,10), M1   |
|                       |                                                   | VvPNCuCad [93]      | ADR74226     | Cubebol, $\delta$ -cadinene | C(N1,10), M1  |
|                       |                                                   | VvPNaHum [93]       | ADR74227     | $\alpha$ -humulene          | C(1,11)       |
|                       |                                                   | VvPNEb2epi Car [93] | ADR74228     | (E)- $\beta$ -caryophyllene | C(1,11)       |
|                       |                                                   | VvGwbOciF/          | ADR74207/    | (E,E)- $\alpha$ -farnesene  | A, U, M       |
|                       |                                                   | VvCSbOciF [93]      | ADR74208     |                             |               |
|                       |                                                   | VvPNLinNer1 [93]    | ADR74210     | (E)-Nerolidol               | A, U, B(GPP)  |
|                       |                                                   | VvPNLinNer2 [93]    | ADR74211     | (E)-Nerolidol               | A, U, B(GPP)  |
|                       |                                                   | VvCSLinNer [93]     | ADR74212     | (E)-Nerolidol               | A, U, B(GPP)  |
|                       |                                                   | VvPNLNGl1 [93]      | ADR74213     | (E)-Nerolidol               | A, U, T       |
|                       |                                                   | VvPNLNGl2 [93]      | ADR74214     | (E)-Nerolidol               | A, U, T       |
|                       |                                                   | VvPNLNGl3 [93]      | ADR74215     | (E)-Nerolidol               | A, U, T       |
|                       |                                                   | VvPNLNGl4 [93]      | ADR74216     | (E)-Nerolidol               | A, U, T       |
|                       |                                                   | VvCSEnerGl [93]     | ADR74219     | (E)-Nerolidol               | A, U, B(GGPP) |
|                       |                                                   | VvPNEnerGl [93]     | ADR74220     | (E)-Nerolidol               | A, U, B(GGPP) |
|                       |                                                   | VvShTPS07 [94]      | NP_001268063 | Ylangene                    | C(N1,10), M1  |
|                       |                                                   | VvShTPS26 [94]      | XP_002283070 | $\alpha$ -Cubebene          | C(N1,10), M1  |

|                                        |                                                                   | VvShTPS27 [94]                                                                                                                                                                                        | XP_019072407                                                                                                                     | Isocaryophyllene                                                                                                                                                                                                        | C(1,11)                                                                                                                                                                       |
|----------------------------------------|-------------------------------------------------------------------|-------------------------------------------------------------------------------------------------------------------------------------------------------------------------------------------------------|----------------------------------------------------------------------------------------------------------------------------------|-------------------------------------------------------------------------------------------------------------------------------------------------------------------------------------------------------------------------|-------------------------------------------------------------------------------------------------------------------------------------------------------------------------------|
| Species                                | Genus                                                             | Gene name                                                                                                                                                                                             | GenBank                                                                                                                          | Products                                                                                                                                                                                                                | Function                                                                                                                                                                      |
| <i>Cistus Creticus Subsp. Creticus</i> | <i>Malvales</i><br><i>Cistaceae</i><br><i>Cistus</i>              | CcGer [95]                                                                                                                                                                                            | ACF94469                                                                                                                         | germacrene B                                                                                                                                                                                                            | C(1,10)                                                                                                                                                                       |
| <i>Gossypium hirsutum</i>              | <i>Malvales</i><br><i>Malvaceae</i>                               | GhTPS1 [96]<br>GhTPS2 [96]                                                                                                                                                                            | AGX84975<br>AGX84976                                                                                                             | $\beta$ -caryophyllene<br>guaia-1(10),11-diene                                                                                                                                                                          | C(1,11)<br>C(1,10)                                                                                                                                                            |
| <i>Gossypium arboreum</i>              | <i>Gossypium</i>                                                  | XC1/XC14 [97]<br>CAD1-A [98]<br>SaSQS1 [99]<br>SaSQS2 [99]<br>SaBS [99]<br>SaSS [99]<br>SaSSy [99]                                                                                                    | AAA93064<br>NP_001316949<br>AIV42939<br>AIV42940<br>AIV42941<br>AGV01243<br>E3W202                                               | (+)- $\delta$ -Cadinene<br>(+)- $\delta$ -Cadinene<br>Sesquisabinene<br>Sesquisabinene<br>(S)- $\beta$ -bisabolene<br>$\alpha$ -santalene<br>$\alpha$ -santalene                                                        | C(N1,10), U<br>C(N1,10), U<br>C(N1,6), B(GPP)<br>C(N1,6), B(GPP)<br>C(N1,6), B(GPP)<br>C(N1,6), M1<br>C(N1,6), M1                                                             |
| <i>Santalum album</i>                  | <i>Santalales</i><br><i>Santalaceae</i><br><i>Santalum</i>        | SamonoTPS1 [100]<br>SaSesquiTPS1 [100]<br>SaTPS2 [101]<br>SaTPS3 [101]<br>SspiTPS4 [102]<br>SspiSSy [103]<br>SspiBS [103]<br>SspiSesquiTPS [103]<br>SauSSy [103]<br>SauBS [103]<br>SauSesquiTPS [103] | ACF24767<br>ACF24768<br>AZM65215<br>AZM65216<br>AJG35803<br>ADO87002<br>ADO87004<br>ADO87006<br>ADO87001<br>ADO87003<br>ADO87005 | $\beta$ -bisabolene<br>germacrene D-4-ol<br>sesquisabinene<br>(E)-nerolidol<br>sesquisabinene B<br>$\alpha$ -santalene<br>$\beta$ -bisabolene<br>hedycaryol<br>$\alpha$ -santalene<br>$\beta$ -bisabolene<br>a-humulene | C(N1,6), U, M<br>C(1,10), M1, B(GPP)<br>C(N1,6), M1, B(GPP)<br>A, M1, B(GPP)<br>C(N1,6), B(GPP)<br>C(N1,6)<br>C(N1,6)<br>C(1,10)<br>C(N1,6)<br>C(N1,6), B(GPP)<br>C(1,11), M2 |
| <i>Santalum austrocaledonicum</i>      |                                                                   | PmSTS [104]<br>PmSTPS1 [105]<br>PmSTPS2 [105]<br>PhDS [106]<br>CsNES [107]                                                                                                                            | AFN57631<br>-<br>AWK77755<br>AHF22834<br>ARQ20729                                                                                | $\beta$ -sesquiphellandrene<br>$\alpha$ -farnesene<br>nerolidol<br>drimenol<br>(E)-nerolidol                                                                                                                            | C(N1,6)<br>A, M1<br>A<br>U<br>A, U, B(GPP)                                                                                                                                    |
| <i>Persicaria minor</i>                | <i>Caryophyllales</i><br><i>Polygonaceae</i><br><i>Persicaria</i> | CsLIS/NES-1 [108]<br>CsLIS/NES-2 [108]<br>CsAFS [109]<br>CbTPS1 [110]<br>AdAFS1 [111]<br>AdGDS1 [111]                                                                                                 | AGX26045<br>-<br>-<br>A0A140KFG9<br>ACO40485<br>AAX16121                                                                         | (E)-nerolidol<br>(E)-nerolidol<br>$\alpha$ -farnesene<br>hedycaryol<br>(E,E)- $\alpha$ -farnesene<br>(+)-germacrene D                                                                                                   | A, U, M<br>A, U, B(GPP)<br>A, U, B(GPP)<br>C(1,10), U<br>A, B(GPP)<br>C(1,10)/(N1,10), U                                                                                      |
| <i>Camellia sinensis</i>               | <i>Ericales</i><br><i>Theaceae</i><br><i>Camellia</i>             |                                                                                                                                                                                                       |                                                                                                                                  |                                                                                                                                                                                                                         |                                                                                                                                                                               |
| <i>Camellia brevistyla</i>             |                                                                   |                                                                                                                                                                                                       |                                                                                                                                  |                                                                                                                                                                                                                         |                                                                                                                                                                               |
| <i>Actinidia deliciosa</i>             | <i>Ericales</i><br><i>Actinidiaceae</i>                           |                                                                                                                                                                                                       |                                                                                                                                  |                                                                                                                                                                                                                         |                                                                                                                                                                               |

| <i>Actinidia chinensis</i>      | <i>Actinidia</i>                                            | AcNES1 [112]     | AER36088   | (S)-(E)-nerolidol                                   | A, T                    |
|---------------------------------|-------------------------------------------------------------|------------------|------------|-----------------------------------------------------|-------------------------|
| Species                         | Genus                                                       | Gene name        | GenBank    | Products                                            | Function                |
| <i>Ocimum basilicum</i>         | <i>Lamiales</i><br><i>Lamiaceae</i><br><i>Ocimum</i>        | ObSES [113]      | AAV63785   | β-selinene                                          | C(1,10), M1             |
|                                 |                                                             | ObCDS [113]      | Q5SBP5     | γ-cadinene                                          | C(N1,10)                |
|                                 |                                                             | ObZIS [113]      | AAV63788   | α-zingiberene                                       | C(N1,6), M2, B(GPP)     |
|                                 |                                                             | ObGDS [113]      | AAV63786   | germacrene D                                        | C(1,10)/(N1,10)         |
| <i>Ocimum kilimandscharicum</i> |                                                             | OkBCS [113]      | AKA94109   | β-caryophyllene                                     | C(1,11)                 |
| <i>Lavandula angustifolia</i>   | <i>Lamiales</i><br><i>Lamiaceae</i><br><i>Lavandula</i>     | LaBERS [114]     | ABB73046   | trans-α-bergamotene                                 | C(N1,6), B(GPP)         |
|                                 |                                                             | LaGERDS [115]    | AGL98420   | germacrene D                                        | C(1,10)/(N1,10)         |
|                                 |                                                             | LaCARS [115]     | AGL98419   | (E)-β-caryophyllene                                 | C(1,11), U, B(GPP)      |
|                                 |                                                             | LaCADS [115]     | AGL98418   | τ-cadinol                                           | C(N1,10)                |
| <i>Lavandula X Intermedia</i>   |                                                             | LiCPS [116]      | AGU13712   | 9-epi-caryophyllene                                 | C(1,11), U, B(GPP)      |
| <i>Lavandula pedunculata</i>    |                                                             | LpGEAS [117]     | AGN72800   | germacrene A                                        | C(1,10), U              |
| <i>Lavandula stoechas</i>       |                                                             | LsGEAS [117]     | AGN72803   | germacrene A                                        | C(1,10), U              |
| <i>Lavandula viridis</i>        |                                                             | LvGEAS [117]     | AGN72806   | germacrene A                                        | C(1,10), U              |
| <i>Leucosceptrum canum</i>      | <i>Lamiales</i><br><i>Lamiaceae</i><br><i>Leucosceptrum</i> | Lc-CedS [118]    | QBP05430   | cedrol                                              | C(N1,6)                 |
| <i>Origanum vulgare</i>         | <i>Lamiales</i><br><i>Lamiaceae</i><br><i>Origanum</i>      | OvTPS3 [119]     | ADK73619   | (-)-germacrene D                                    | C(1,10)/(N1,10), B(GPP) |
|                                 |                                                             | OvTPS4 [119]     | ADK73618   | alloaromadendrene                                   | C(1,10), B(GPP)         |
|                                 |                                                             | OvTPS6-d06 [119] | ADK73616   | (E)-β-caryophyllene                                 | C(1,11)                 |
|                                 |                                                             | OvTPS6-f02 [119] | ADK73615   | (E)-β-caryophyllene                                 | C(1,11)                 |
| <i>Mentha x piperita</i>        | <i>Lamiales</i><br><i>Lamiaceae</i><br><i>Mentha</i>        | MxpFAS [120]     | O48935     | (E)-β-farnesene                                     | A, B(GPP)               |
|                                 |                                                             | MxpSS1 [121]     | Q5W283     | cis-muurola-3,5-diene,<br>cis-muurola-4(14),5-diene | C(N1,10)                |
|                                 |                                                             | PatTpsA [122]    | AAS86319   | γ-curcumene                                         | C(N1,6), L              |
| <i>Pogostemon cablin</i>        | <i>Lamiales</i><br><i>Lamiaceae</i><br><i>Pogostemon</i>    | PatTpsBF2 [122]  | AAS86320   | (-)-germacrene D                                    | C(1,10), L              |
|                                 |                                                             | PatTpsCF2 [122]  | AAS86321   | (+)-germacrene A                                    | C(1,10)                 |
|                                 |                                                             | PatTpsB15 [122]  | AAS86322   | (-)-germacrene D                                    | C(1,10), M2             |
|                                 |                                                             | PatTps177 [122]  | Q49SP3     | (-)-patchoulol                                      | C(1,10), M2             |
|                                 |                                                             | PTSiso [123]     | AAS86323   | germacrene A                                        | C(1,10), M1             |
| <i>Osmanthus fragrans</i>       | <i>Lamiales</i><br><i>Oleaceae</i><br><i>Osmanthus</i>      | OfTPS4 [124]     | A0A109QXM3 | α-farnesene                                         | A, U                    |

| Species                                      | Genus                                                         | Gene name            | GenBank  | Products                              | Function            |
|----------------------------------------------|---------------------------------------------------------------|----------------------|----------|---------------------------------------|---------------------|
| <i>Antirrhinum majus</i>                     | <i>Lamiales</i>                                               | AmNES/LIS-1 [125]    | ABR24417 | (3S)(E)-nerolidol                     | A, B(GPP)           |
|                                              | <i>Plantaginaceae</i><br><i>Antirrhinum</i>                   | AmNES/LIS-2 [125]    | ABR24418 | (3S)(E)-nerolidol                     | A, U, M             |
| <i>Phyla dulcis/ Lippia</i><br><i>Dulcis</i> | <i>Lamiales</i><br><i>Verbenaceae</i><br><i>Phyla /Lippia</i> | LdTPS1 [126]         | J7LP58   | $\alpha$ -Copaene、 $\delta$ -cadinene | C(N1,10)            |
|                                              |                                                               | LdTPS5 [126]         | J7LMP2   | bicyclogermacrene                     | C(1,10)             |
|                                              |                                                               | LdTPS6 [126]         | J7LJN5   | $\beta$ -caryophyllene                | C(1,11), U          |
|                                              |                                                               | LdTPS7 [126]         | J7LQ09   | trans- $\alpha$ -bergamotene          | C(N1,6)             |
|                                              |                                                               | LdTPS8 [126]         | J7LH11   | $\alpha$ -bisabolol                   | C(N1,6), U          |
|                                              |                                                               | ShSBS [127]          | ACJ38409 | (+)-endo- $\beta$ -bergamotene        | C(N1,6), B(GPP)     |
|                                              |                                                               | ShTPS9 [128]         | AEM23825 | germacrene B                          | C(1,10), B(GPP)     |
|                                              |                                                               | ShTPS12 [128]        | AEM23826 | $\alpha$ -humulene                    | C(1,11), B(GPP)     |
|                                              |                                                               | ShTPS17 [128]        | AEM23828 | valencene                             | C(1,10), B(GPP)     |
|                                              |                                                               | ShTPS15b [128]       | AEM23830 | germacrene A                          | C(1,10)             |
| <i>Solanum habrochaites</i>                  |                                                               | ShTPS14a [128]       | AEM23827 | (Z)- $\alpha$ -bisabolene             | C(N1,6), B(GPP), M1 |
|                                              |                                                               | ShTPS14b [128]       | AEM23829 | $\beta$ -bisabolene                   | C(N1,6), M1         |
|                                              |                                                               | SSTLH1 [129]         | Q9FQ27   | germacrene B                          | C(1,10), U          |
|                                              |                                                               | SSTLH2 [129]         | AAG41892 | Germacrene D                          | C(1,10)             |
|                                              |                                                               | ShZIS [130]          | AFJ67794 | 7-epizingiberene                      | C(N1,6)             |
|                                              |                                                               | SITPS9(STLE1) [128]  | AEM05858 | germacrene C                          | C(1,10), B(GPP)     |
|                                              |                                                               | SITPS12 [128]        | AEP82783 | $\beta$ -caryophyllene                | C(1,11), B(GPP)     |
|                                              |                                                               | SITPS17 [128]        | AEP82780 | valencene                             | C(1,10), B(GPP)     |
|                                              |                                                               | SITPS14 [128]        | AEP82782 | (Z)- $\gamma$ -bisabolene             | C(N1,6), B(GPP)     |
|                                              |                                                               | SITPS31 [128]        | AEM23833 | viridiflorene                         | C(1,10), U          |
|                                              |                                                               | SITPS36 [131]        | AEP82770 | -                                     | -                   |
|                                              |                                                               | SITPS32 [131]        | AEP82773 | viridiflorene                         | C(1,10)             |
|                                              |                                                               | SITPS38 [131]        | AEP82768 | $\alpha$ -bergamotene                 | C(N1,6)             |
|                                              |                                                               | SITPS37 [131]        | AEP82769 | nerolidol                             | A, B(GPP)           |
|                                              |                                                               | SITPS39 [131]        | AEP82767 | nerolidol                             | A, B(GPP)           |
| <i>Solanum lycopersicum</i>                  |                                                               | SSTLE2 [129]         | AAG41890 | $\delta$ -elemene                     | C(1,10)             |
|                                              |                                                               | SITPS5(LeMTS1) [131] | AAX69063 | (E)-nerolidol                         | A, U, M             |
|                                              |                                                               | pLE11.3 [132]        | -        | germacrene C                          | C(1,10), B(GPP)     |
|                                              |                                                               | pLE14.2 [132]        | AAC39432 | germacrene C                          | C(1,10)             |
|                                              |                                                               | pLE20.3 [132]        | AAC39431 | germacrene C                          | C(1,10)             |
| <i>Solanum elaeagnifolium</i>                |                                                               | CI7653 [133]         | -        | $\beta$ -caryophyllene                | C(1,11)             |



| Species                          | Genus             | Gene name     | GenBank    | Products                        | Function            |
|----------------------------------|-------------------|---------------|------------|---------------------------------|---------------------|
| <i>Hyoscyamus muticus</i>        | <i>Solanales</i>  | HuVS1 [134]   | Q39978     | vetispiradiene                  | C(1,10), U          |
|                                  | <i>Solanaceae</i> | HuVS2 [134]   | Q39979     | vetispiradiene                  | C(1,10), U          |
|                                  | <i>Hyoscyamus</i> | HuVS3 [134]   | Q39980     | vetispiradiene                  | C(1,10), U          |
| <i>Capsicum annuum</i>           | <i>Solanales</i>  |               |            |                                 |                     |
|                                  | <i>Solanaceae</i> | PEAS [135]    | AAC61260   | 5-epi-aristolochene             | C(1,10), U          |
| <i>Nicotiana tabacum</i>         | <i>Capsicum</i>   |               |            |                                 |                     |
|                                  |                   | EAS110 [136]  | AAP79448   | 5-epi-aristolochene             | C(1,10), U          |
| <i>Nicotiana attenuata</i>       | <i>Solanales</i>  | TEAS [137]    | Q40577     | 5-epi-aristolochene             | C(1,10)             |
|                                  | <i>Solanaceae</i> | NaEAS12 [138] | Q84LF2     | 5-epi-aristolochene             | C(1,10), U          |
|                                  | <i>Nicotiana</i>  | NaEAS34 [138] | Q84LF1     | 5-epi-aristolochene             | C(1,10), U          |
| <i>Matricaria recutita</i>       |                   | NaEAS37 [138] | Q84LF0     | 5-epi-aristolochene             | C(1,10), U          |
|                                  |                   | MrTPS1 [139]  | A0A075W0Z3 | (-)- $\alpha$ -bisabolol        | C(N1,6), U          |
|                                  |                   | MrTPS4 [139]  | A0A075W3D9 | Bicyclogermacrene               | C(1,10), U          |
|                                  | <i>Asterales</i>  | MrTPS6 [139]  | A0A075W2D6 | $\beta$ -farnesene              | A, U                |
|                                  | <i>Asteraceae</i> | MrTPS1' [140] | AFM43734   | (-)-(E)- $\beta$ -caryophyllene | C(1,11)             |
|                                  | <i>Matricaria</i> | MrTPS2' [140] | AFM43735   | $\alpha$ -isocomene             | C(1,11)             |
|                                  |                   | MrTPS3' [140] | I6QSN0     | (+)-germacrene A                | C(1,10), U          |
|                                  |                   | MrTPS5' [140] | AFM43738   | (-)-germacrene D                | C(1,10)/(N1,10), M2 |
|                                  |                   | Mr-bFS [141]  | AIW60869   | (E)- $\beta$ -farnesene         | A, U                |
|                                  | <i>Asterales</i>  | Sc1 [142]     | CAC36896   | (+)-(10R)-germacrene A          | C(1,10)             |
| <i>Solidago Canadensis</i>       | <i>Asteraceae</i> | Sc19 [143]    | Q70EZ6     | (-)-germacrene D                | C(1,10)             |
|                                  | <i>Solidago</i>   | Sc11 [143]    | Q70EZ7     | (+)-germacrene D                | C(1,10)             |
| <i>Ixeris dentate</i>            | <i>Asterales</i>  |               |            |                                 |                     |
|                                  | <i>Asteraceae</i> | IdGAS [144]   | AAL92481   | (+)-germacrene A                | C(1,10), U          |
| <i>Barnadesia spinosa</i>        | <i>Ixeris</i>     |               |            |                                 |                     |
|                                  | <i>Asterales</i>  | BsGAS1 [145]  | AIX97167   | germacrene A                    | C(1,10), U          |
|                                  | <i>Asteraceae</i> | BsGAS2 [145]  | AIX97168   | germacrene A                    | C(1,10), U          |
| <i>Taraxacum officinale</i>      | <i>Barnadesia</i> |               |            |                                 |                     |
|                                  | <i>Asterales</i>  | ToGAS1 [146]  | ALY05868   | (+)-germacrene A                | C(1,10), U          |
|                                  | <i>Asteraceae</i> | ToGAS2 [146]  | ALY05869   | (+)-germacrene A                | C(1,10), U          |
| <i>Tanacetum cinerariifolium</i> | <i>Taraxacum</i>  |               |            |                                 |                     |
|                                  | <i>Asterales</i>  | TcGAS [147]   | AGO03788   | germacrene A                    | C(1,10), U          |
| <i>Tanacetum parthenium</i>      | <i>Asteraceae</i> | TpGAS [148]   | AEH41844   | germacrene A                    | C(1,10), U          |

|                                 |                                              | TpCarS [148]        | AEH41845     | b-caryophyllene             | C(1,11)         |
|---------------------------------|----------------------------------------------|---------------------|--------------|-----------------------------|-----------------|
| Species                         | Genus                                        | Gene name           | GenBank      | Products                    | Function        |
| <i>Eremanthus erythropappus</i> | Asterales<br>Asteraceae<br><i>Eremanthus</i> | EeBOS1 [149]        | AYJ71561     | (-)- $\alpha$ -bisabolol    | C(N1,6), U      |
| <i>Cichorium intybus</i>        | Asterales<br>Asteraceae<br><i>Cichorium</i>  | CiGASsh [150]       | Q8LSC2       | (+)-germacrene A            | C(1,10), U      |
|                                 |                                              | CiGASlo [150]       | Q8LSC3       | (+)-germacrene A            | C(1,10), U      |
| <i>Lactuca sativa</i>           | Asterales<br>Asteraceae<br><i>Lactuca</i>    | LTC1 [151]          | AAM11626     | germacrene A                | C(1,10), U      |
|                                 |                                              | LTC2 [151]          | AAM11627     | germacrene A                | C(1,10), U      |
|                                 |                                              | HaTPS12-K7 [152]    | AME16497     | (Z)- $\gamma$ -bisabolene   | C(N1,6), U      |
|                                 |                                              | HaTPS12-K11 [152]   | AME16498     | (Z)- $\gamma$ -bisabolene   | C(N1,6), U      |
| <i>Helianthus annuus</i>        | Asterales<br>Asteraceae<br><i>Helianthus</i> | HaGAS1 [153]        | AAAY41421    | germacrene A                | C(1,10), U      |
|                                 |                                              | HaGAS2 [153]        | ABY49939     | germacrene A                | C(1,10), U      |
|                                 |                                              | HaTPS2 (HaCS) [153] | ACA33926     | $\delta$ -cadinene          | C(N1,10), M1    |
|                                 |                                              | HaGAS3 [154]        | ACZ50512     | germacrene A                | C(1,10)         |
| <i>Xanthium Strumarium</i>      | Asterales<br>Asteraceae<br><i>Xanthium</i>   | XsTPS1 [155]        | AMP42987     | germacrene D                | C(1,10)/(N1,10) |
|                                 |                                              | XsTPS2 [155]        | AMP42991     | guaia-4,6-diene             | C(1,10), U      |
|                                 |                                              | XsTPS3 [155]        | AJT60315     | germacrene A                | C(1,10), U      |
|                                 |                                              | CsTPS1 [156]        | -            | $\alpha$ -muurolene         | C(N1,10), U     |
| <i>Centaurea stoebe</i>         | Asterales<br>Asteraceae<br><i>Centaurea</i>  | CsTPS4 [156]        | -            | (E)- $\beta$ -caryophyllene | C(1,11)         |
|                                 |                                              | CsTPS5 [156]        | -            | daucadiene                  | M2              |
|                                 |                                              | CsTPS7 [156]        | -            | (E)- $\alpha$ -bisabolene   | C(N1,6)         |
|                                 |                                              | CsTPS8 [156]        | -            | $\alpha$ -zingiberene       | C(N1,6), L      |
| <i>Achillea millefolium</i>     | Asterales<br>Asteraceae<br><i>Achillea</i>   | AmGAS [157]         | AGD80135     | Germacrene A                | C(1,10),B(GPP)  |
| <i>Senecio scandens</i>         | Asterales<br>Asteraceae<br><i>Senecio</i>    | SsNES [158]         | MH518312     | (E)-nerolidol               | A, U            |
| <i>Cynara cardunculus</i>       | Asterales<br>Asteraceae<br><i>Cynara</i>     | CcGAS [159]         | AET95645     | (+) germacrene A            | C(1,10), U      |
| <i>Daucus carota</i>            | Apiales<br>Apiaceae                          | DcTPS1 [160]        | XP_017214942 | (E)- $\beta$ -caryophyllene | C(1,11), B(GPP) |

*Daucus*

| Species                              | Genus                 | Gene name        | GenBank    | Products                 | Function            |
|--------------------------------------|-----------------------|------------------|------------|--------------------------|---------------------|
| <i>Artemisia absinthium</i>          |                       | AabKOS [161]     | A0A1L7NYG2 | Koidzumiol               | C(N1,6), U          |
| <i>Artemisia kurramensis</i>         |                       | AkBOS [161]      | A0A1L7NYG3 | (+)- $\alpha$ -Bisabolol | C(N1,6), U          |
|                                      |                       | AmBOS [161]      | A0A1L7NYF8 | (+)- $\alpha$ -Bisabolol | C(N1,6), U          |
| <i>Artemisia maritima</i>            |                       | AmAOS [162]      | BBG75037   | 4-amorphen-11-ol         | C(N1,6)             |
|                                      |                       | AaBOS [163]      | M4GGS0     | $\alpha$ -bisabolol      | C(N1,6), M2         |
|                                      |                       | AaGAS [164]      | ABE03980   | germacrene A             | C(1,10), U          |
| <i>Artemisia annua</i>               | <i>Asterales</i>      | QHS1 [165]       | AAL79181   | $\beta$ -caryophyllene   | C(1,11)             |
|                                      | <i>Asteraceae</i>     | AaADS [166]      | AFA34434   | amorpha-4,11-diene       | C(N1,6), M2         |
|                                      | <i>Artemisia</i>      | AaECS1 [167]     | CAC08805   | epi-cedrol               | C(N1,6), M2, B(GPP) |
|                                      |                       | AaBFS [168]      | AAX39387   | (E)- $\beta$ -farnesene  | A, U                |
|                                      |                       | AabrBOS1 [169]   | -          | (+)- $\alpha$ -bisabolol | C(N1,6), U          |
|                                      |                       | AabrBOS2 [169]   | -          | (+)- $\alpha$ -bisabolol | C(N1,6), U          |
| <i>Artemisia abrotanum</i>           |                       | AabrBOS3 [169]   | -          | (+)- $\alpha$ -bisabolol | C(N1,6), U          |
|                                      |                       | AabrBOS4 [169]   | -          | (+)- $\alpha$ -bisabolol | C(N1,6), U          |
|                                      |                       | AabrSPS [169]    | -          | 7-epi-silphiperfol-5-ene | C(1,11), U          |
|                                      |                       | TgTPS1 [170]     | AFV09098   | trans-nerolidol          | A                   |
| <i>Thapsia garganica</i>             |                       | TgTPS2 [170]     | AFV09099   | kunzeaol                 | C(1,10), M2         |
|                                      | <i>Apiales</i>        | TITPS820 [171]   | AZL40026   | epikunzeaol              | C(1,10), U          |
|                                      | <i>Apiaceae</i>       | TITPS509 [171]   | AZL40028   | Guaiol                   | C(1,10), M1         |
| <i>Thapsia laciniata</i>             | <i>Thapsia</i>        | TITPS18983 [171] | AZL40027   | farnesene                | A, M1               |
|                                      |                       | TITPS7414 [172]  | AMU19318   | (-)-germacrene D         | C(1,10)/(N1,10)     |
|                                      |                       | AscTps1 [48]     | BBE32330   | $\beta$ -caryophyllene   | C(1,11)             |
| <i>Acanthopanax sciadophylloides</i> | <i>Apiales</i>        | AscTps2a [48]    | BBE32331   | germacrene D             | C(1,10)/(N1,10), U  |
|                                      | <i>Araliaceae</i>     | AscTPS3 [48]     | BBE32339   | nerolidol                | A, B(GPP)           |
| <i>Acanthopanax sieboldianus</i>     | <i>Acanthopanax</i>   | AsiTPS1a [48]    | BBE32335   | $\beta$ -caryophyllene   | C(1,11)             |
|                                      |                       | VoTPS1' [173]    | AFR42417   | germacrene C             | C(1,10)             |
|                                      | <i>Dipsacales</i>     | VoTPS2' [173]    | AFR42418   | valerena-4,7(11)-diene   | C(1,10)             |
| <i>Valeriana Officinalis</i>         | <i>Caprifoliaceae</i> | VoTPS1 [174]     | AGB05610   | valerena-1,10-diene      | C(1,10), B(GPP)     |
|                                      | <i>Valeriana</i>      | VoTPS7 [174]     | AGB05616   | germacrene C             | C(1,10), B(GPP)     |
|                                      |                       | VoTPS3' [175]    | AFR42419   | (-)-drimenol             | U                   |

Note as Table S1.

**Table S4.** Plasmids and strains used in this study

| Name           | Description                                                                                                                                                                                                                                                                                                                                                                                                                                                                                                                                                                                                                                                                                                                                                       | Resource          |
|----------------|-------------------------------------------------------------------------------------------------------------------------------------------------------------------------------------------------------------------------------------------------------------------------------------------------------------------------------------------------------------------------------------------------------------------------------------------------------------------------------------------------------------------------------------------------------------------------------------------------------------------------------------------------------------------------------------------------------------------------------------------------------------------|-------------------|
| Plasmids       |                                                                                                                                                                                                                                                                                                                                                                                                                                                                                                                                                                                                                                                                                                                                                                   |                   |
| pESC-URA       | 2 $\mu$ , URA3                                                                                                                                                                                                                                                                                                                                                                                                                                                                                                                                                                                                                                                                                                                                                    | stored in the lab |
| pESCU-CaTPS2   | cloning <i>CaTPS2</i> into pESC-URA                                                                                                                                                                                                                                                                                                                                                                                                                                                                                                                                                                                                                                                                                                                               | this study        |
| pESCU-CaTPS3   | cloning <i>CaTPS3</i> into pESC-URA                                                                                                                                                                                                                                                                                                                                                                                                                                                                                                                                                                                                                                                                                                                               | this study        |
| pESCU-CaTPS4   | cloning <i>CaTPS4</i> into pESC-URA                                                                                                                                                                                                                                                                                                                                                                                                                                                                                                                                                                                                                                                                                                                               | stored in the lab |
| Strains        |                                                                                                                                                                                                                                                                                                                                                                                                                                                                                                                                                                                                                                                                                                                                                                   |                   |
| LWG003         | CEN.PK2-1C derivative; <i>leu2-3,112:: G418<sup>R</sup>_T<sub>ERG19</sub>(RC)-ERG19(RC)-P<sub>GAL1</sub>(RC)_P<sub>GAL10</sub>-ERG8-T<sub>ERG8</sub>; his3<math>\Delta</math>1:: HIS3 _T<sub>ERG12</sub>(RC)-ERG12(RC)-P<sub>GAL1</sub>(RC)_P<sub>GAL10</sub>-ERG10-T<sub>ERG10</sub>; ade1<math>\Delta</math>:: T<sub>HMG1</sub>(RC)-tHMG1(RC)-P<sub>GAL1</sub>(RC)_P<sub>GAL10</sub>-IDI1-T<sub>IDI1</sub>_ADE1; <i>ura3-52:: T<sub>HMG1</sub>(RC)-tHMG1(RC)-P<sub>GAL1</sub>(RC)_P<sub>GAL10</sub>-ERG13-T<sub>ERG13</sub>; trp1-289:: T<sub>HMG1</sub>(RC)-tHMG1(RC)-P<sub>GAL1</sub>(RC)_P<sub>GAL10</sub>-ERG20-T<sub>ERG20</sub>_TRP1; <math>\Delta</math>GAL80::P<sub>GAL2</sub>-<i>upc2-1</i>-T<sub>ADH1</sub>; <math>\Delta</math>PERG9:: PHXT1</i></i> | stored in the lab |
| LWG003- CaTPS2 | LWG003, pESCU-CaTPS2                                                                                                                                                                                                                                                                                                                                                                                                                                                                                                                                                                                                                                                                                                                                              | this study        |
| LWG003- CaTPS3 | LWG003, pESCU-CaTPS3                                                                                                                                                                                                                                                                                                                                                                                                                                                                                                                                                                                                                                                                                                                                              | this study        |
| LWG003- CaTPS4 | LWG003, pESCU-CaTPS4                                                                                                                                                                                                                                                                                                                                                                                                                                                                                                                                                                                                                                                                                                                                              | this study        |

## References

1. Jia, Q.; Li, G.; Kollner, T.G.; Fu, J.; Chen, X.; Xiong, W.; Crandall-Stotler, B.J.; Bowman, J.L.; Weston, D.J.; Zhang, Y.; et al. Microbial-type terpene synthase genes occur widely in nonseed land plants, but not in seed plants. *P Natl Acad Sci USA* **2016**, *113*, 12328-12333, doi:10.1073/pnas.1607973113.
2. Li, G.; Koellner, T.G.; Yin, Y.; Jiang, Y.; Chen, H.; Xu, Y.; Gershenzon, J.; Pichersky, E.; Chen, F. Nonseed plant *Selaginella moellendorffii* has both seed plant and microbial types of terpene synthases. *P Natl Acad Sci USA* **2012**, *109*, 14711-14715, doi:10.1073/pnas.1204300109.
3. Xiong, W.; Fu, J.; Koellner, T.G.; Chen, X.; Jia, Q.; Guo, H.; Qian, P.; Guo, H.; Wu, G.; Chen, F. Biochemical characterization of microbial type terpene synthases in two closely related species of hornworts, *Anthoceros punctatus* and *Anthoceros agrestis*. *Phytochemistry* **2018**, *149*, 116-122, doi:10.1016/j.phytochem.2018.02.011.
4. Kumar, S.; Kempinski, C.; Zhuang, X.; Norris, A.; Mafu, S.; Zi, J.; Bell, S.A.; Nybo, S.E.; Kinison, S.E.; Jiang, Z.; et al. Molecular Diversity of Terpene Synthases in the Liverwort *Marchantia polymorpha*. *Plant Cell* **2016**, *28*, 2632-2650, doi:10.1105/tpc.16.00062.
5. Parveen, I.; Wang, M.; Zhao, J.; Chittiboyina, A.G.; Tabanca, N.; Ali, A.; Baerson, S.R.; Techen, N.; Chappell, J.; Khan, I.A.; et al. Investigating sesquiterpene biosynthesis in *Ginkgo biloba*: molecular cloning and functional characterization of (E,E)-farnesol and alpha-bisabolene synthases. *Plant Molecular Biology* **2015**, *89*, 451-462, doi:10.1007/s11103-015-0381-3.
6. Ma, L.-T.; Lee, Y.-R.; Liu, P.-L.; Cheng, Y.-T.; Shiu, T.-F.; Tsao, N.-W.; Wang, S.-Y.; Chu, F.-H. Phylogenetically distant group of terpene synthases participates in cadinene and cedrane-type sesquiterpenes accumulation in *Taiwania cryptomerioides*. *Plant Science* **2019**, *289*, doi:10.1016/j.plantsci.2019.110277.
7. Kuo, P.-M.; Hsu, K.-H.; Lee, Y.-R.; Chu, F.-H.; Wang, S.-Y. Isolation and characterization of beta-cadinene synthase cDNA from *Chamaecyparis formosensis* Matsum. *Holzforschung* **2012**, *66*, 569-576, doi:10.1515/hf-2011-0224.
8. Koepke, D.; Schroeder, R.; Fischer, H.M.; Gershenzon, J.; Hilker, M.; Schmidt, A. Does egg deposition by herbivorous pine sawflies affect transcription of sesquiterpene synthases in pine? *Planta* **2008**, *228*, 427-438, doi:10.1007/s00425-008-0747-8.
9. Phillips, M.A.; Wildung, M.R.; Williams, D.C.; Hyatt, D.C.; Croteau, R. cDNA isolation, functional expression, and characterization of (+)-alpha-pinene synthase and (-)-alpha-pinene synthase from loblolly pine (*Pinus taeda*): Stereocontrol in pinene biosynthesis. *Archives of Biochemistry and Biophysics* **2003**, *411*, 267-276, doi:10.1016/s0003-9861(02)00746-4.
10. Steele, C.L.; Crock, J.; Bohlmann, J.; Croteau, R. Sesquiterpene synthases from grand fir (*Abies grandis*) - Comparison of constitutive and wound-induced activities, and cDNA isolation, characterization and bacterial expression of delta-selinene synthase and gamma-humulene synthase. *Journal of Biological Chemistry* **1998**, *273*, 2078-2089, doi:10.1074/jbc.273.4.2078.
11. Bohlmann, J.; Crock, J.; Jetter, R.; Croteau, R. Terpenoid-based defenses in conifers: cDNA cloning, characterization, and functional expression of wound-inducible (E)-alpha-bisabolene synthase from grand fir (*Abies grandis*). *P Natl Acad Sci USA* **1998**, *95*, 6756-6761, doi:10.1073/pnas.95.12.6756.
12. Huber, D.P.W.; Philippe, R.N.; Godard, K.A.; Sturrock, R.N.; Bohlmann, J. Characterization of four terpene synthase cDNAs from methyl jasmonate-induced Douglas-fir, *Pseudotsuga menziesii*. *Phytochemistry* **2005**, *66*, 1427-1439, doi:10.1016/j.phytochem.2005.04.030.
13. Keeling, C.I.; Weisshaar, S.; Ralph, S.G.; Jancsik, S.; Hamberger, B.; Dullat, H.K.; Bohlmann, J. Transcriptome mining, functional characterization, and phylogeny of a large terpene synthase gene family in spruce (*Picea* spp.). *Bmc Plant Biology* **2011**, *11*, doi:10.1186/1471-2229-11-43.
14. Martin, D.M.; Faldt, J.; Bohlmann, J. Functional characterization of nine Norway spruce TPS genes and evolution of gymnosperm terpene synthases of the TPS-d subfamily. *Plant Physiology* **2004**, *135*, 1908-1927, doi:10.1104/pp.104.042028.
15. Lee, S.; Chappell, J. Biochemical and genomic characterization of terpene synthases in *Magnolia grandiflora*. *Plant Physiology* **2008**, *147*, 1017-1033, doi:10.1104/pp.108.115824.
16. Jin, J.; Kim, M.J.; Dhandapani, S.; Tjhang, J.G.; Yin, J.-L.; Wong, L.; Sarojam, R.; Chua, N.-H.; Jang, I.-C. The floral transcriptome of ylang ylang (*Cananga odorata* var. *fruticosa*) uncovers biosynthetic pathways for volatile organic compounds and a multifunctional and novel sesquiterpene synthase. *Journal of Experimental Botany* **2015**, *66*, 3959-3975, doi:10.1093/jxb/erv196.
17. Yahyaa, M.; Matsuba, Y.; Brandt, W.; Doron-Faigenboim, A.; Bar, E.; McClain, A.; Davidovich-Rikanati, R.; Lewinsohn, E.; Pichersky, E.; Ibdah, M. Identification, Functional Characterization, and Evolution of

- Terpene Synthases from a Basal Dicot. *Plant Physiology* **2015**, 169, 1683-1697, doi:10.1104/pp.15.00930.
18. Jin, Z.; Kwon, M.; Lee, A.-R.; Ro, D.-K.; Wungsintaweekul, J.; Kim, S.-U. Molecular cloning and functional characterization of three terpene synthases from unripe fruit of black pepper (*Piper nigrum*). *Archives of Biochemistry and Biophysics* **2018**, 638, 35-40, doi:10.1016/j.abb.2017.12.011.
19. Abbas, F.; Ke, Y.; Zhou, Y.; Ashraf, U.; Li, X.; Yu, Y.; Yue, Y.; Ahmad, K.W.; Yu, R.; Fan, Y. Molecular cloning, characterization and expression analysis of LoTPS2 and LoTPS4 involved in floral scent formation in oriental hybrid *Lilium* variety 'Siberia'. *Phytochemistry* **2020**, 173, doi:10.1016/j.phytochem.2020.112294.
20. Song, A.A.L.; Abdullah, J.O.; Abdullah, M.P.; Shafee, N.; Rahim, R.A. Functional Expression of an Orchid Fragrance Gene in *Lactococcus lactis*. *International Journal of Molecular Sciences* **2012**, 13, 1582-1597, doi:10.3390/ijms13021582.
21. Gao, F.; Liu, B.; Li, M.; Gao, X.; Fang, Q.; Liu, C.; Ding, H.; Wang, L.; Gao, X. Identification and characterization of terpene synthase genes accounting for volatile terpene emissions in flowers of *Freesia x hybrida*. *Journal of Experimental Botany* **2018**, 69, 4249-4265, doi:10.1093/jxb/ery224.
22. Cheng, A.-X.; Xiang, C.-Y.; Li, J.-X.; Yang, C.-Q.; Hu, W.-L.; Wang, L.-J.; Lou, Y.-G.; Chen, X.-Y. The rice (E)-beta-caryophyllene synthase (OsTPS3) accounts for the major inducible volatile sesquiterpenes. *Phytochemistry* **2007**, 68, 1632-1641, doi:10.1016/j.phytochem.2007.04.008.
23. Yuan, J.S.; Koellner, T.G.; Wiggins, G.; Grant, J.; Degenhardt, J.; Chen, F. Molecular and genomic basis of volatile-mediated indirect defense against insects in rice. *Plant Journal* **2008**, 55, 491-503, doi:10.1111/j.1365-313X.2008.03524.x.
24. Chen, H.; Li, G.; Koellner, T.G.; Jia, Q.; Gershenzon, J.; Chen, F. Positive Darwinian selection is a driving force for the diversification of terpenoid biosynthesis in the genus *Oryza*. *Bmc Plant Biology* **2014**, 14, doi:10.1186/s12870-014-0239-x.
25. Pu, Q.; Liang, J.; Shen, Q.; Fu, J.; Pu, Z.; Liu, J.; Wang, X.; Wang, Q. A Wheat beta-Patchoulene Synthase Confers Resistance against Herbivory in Transgenic *Arabidopsis*. *Genes* **2019**, 10, doi:10.3390/genes10060441.
26. Lee, G.W.; Chung, M.-S.; Lee, S.S.; Chung, B.Y.; Lee, S. Transcriptome-guided identification and functional characterization of key terpene synthases involved in constitutive and methyl jasmonate-inducible volatile terpene formation in *Eremochloa ophiuroides* (Munro) Hack. *Plant Physiology and Biochemistry* **2019**, 141, 193-201, doi:10.1016/j.plaphy.2019.05.032.
27. Muchlinski, A.; Chen, X.; Lovell, J.T.; Koellner, T.G.; Pelot, K.A.; Zerbe, P.; Ruggiero, M.; Callaway, L., III; Laliberte, S.; Chen, F.; et al. Biosynthesis and Emission of Stress-Induced Volatile Terpenes in Roots and Leaves of Switchgrass (*Panicum virgatum* L.). *Frontiers in Plant Science* **2019**, 10, doi:10.3389/fpls.2019.01144.
28. Chen, X.; Wang, Y.; Sun, J.; Wang, J.; Xun, H.; Tang, F. Cloning, expression and functional characterization of two sesquiterpene synthase genes from moso bamboo (*Phyllostachys edulis*). *Protein Expression and Purification* **2016**, 120, 1-6, doi:10.1016/j.pep.2015.11.019.
29. Hartwig, S.; Frister, T.; Alemdar, S.; Li, Z.; Scheper, T.; Beuterl, S. SUMO-fusion, purification, and characterization of a (+)-zizaene synthase from *Chrysopogon zizanioides*. *Biochemical and Biophysical Research Communications* **2015**, 458, 883-889, doi:10.1016/j.bbrc.2015.02.053.
30. Chen, X.; Yang, W.; Zhang, L.; Wu, X.; Cheng, T.; Li, G. Genome-wide identification, functional and evolutionary analysis of terpene synthases in pineapple. *Computational Biology and Chemistry* **2017**, 70, 40-48, doi:10.1016/j.compbiolchem.2017.05.010.
31. Kollner, T.G.; Held, M.; Lenk, C.; Hiltbold, I.; Turlings, T.; Gershenzon, J.; Degenhardt, J. A maize (E)-beta-caryophyllene synthase implicated in indirect defense responses against herbivores is not expressed in most American maize varieties. *The Plant Cell* **2008**, 20, 482-494.
32. Koellner, T.G.; Gershenzon, J.; Degenhardt, J. Molecular and biochemical evolution of maize terpene synthase 10, an enzyme of indirect defense. *Phytochemistry* **2009**, 70, 1139-1145, doi:10.1016/j.phytochem.2009.06.011.
33. Schnee, C.; Kollner, T.G.; Gershenzon, J.; Degenhardt, J. The maize gene terpene synthase 1 encodes a sesquiterpene synthase catalyzing the formation of (E)-beta-farnesene, (E)-nerolidol, and (E,E)-farnesol after herbivore damage. *Plant Physiology* **2002**, 130, 2049-2060, doi:10.1104/pp.008326.
34. Kollner, T.G.; Schnee, C.; Gershenzon, J.; Degenhardt, J. The variability of sesquiterpenes cultivars is controlled by allelic emitted from two *Zea mays* variation of two terpene synthase genes encoding stereoselective multiple product enzymes. *Plant Cell* **2004**, 16, 1115-1131, doi:10.1105/tpc.019877.
35. Koellner, T.G.; Schnee, C.; Li, S.; Svatos, A.; Schneider, B.; Gershenzon, J.; Degenhardt, J. Protonation of a neutral (S)-beta-bisabolene intermediate is involved in (S)-beta-macrocarpene formation by the maize sesquiterpene synthases TPS6 and TPS11. *Journal of Biological Chemistry* **2008**, 283, 20779-20788,

doi:10.1074/jbc.M802682200.

36. Ren, F.; Mao, H.; Liang, J.; Liu, J.; Shu, K.; Wang, Q. Functional characterization of ZmTPS7 reveals a maize tau-cadinol synthase involved in stress response. *Planta* **2016**, *244*, 1065-1074, doi:10.1007/s00425-016-2570-y.
37. Fontana, A.; Held, M.; Fantaye, C.A.; Turlings, T.C.; Degenhardt, J.; Gershenzon, J. Attractiveness of Constitutive and Herbivore-Induced Sesquiterpene Blends of Maize to the Parasitic Wasp *Cotesia marginiventris* (Cresson). *Journal of Chemical Ecology* **2011**, *37*, 582-591, doi:10.1007/s10886-011-9967-7.
38. Richter, A.; Schaff, C.; Zhang, Z.; Lipka, A.E.; Tian, F.; Kollner, T.G.; Schnee, C.; Preiss, S.; Irmisch, S.; Jander, G.; et al. Characterization of Biosynthetic Pathways for the Production of the Volatile Homoterpenes DMNT and TMTT in *Zea mays*. *Plant Cell* **2016**, *28*, 2651-2665, doi:10.1105/tpc.15.00919.
39. Ding, Y.; Huffaker, A.; Kollner, T.G.; Weckwerth, P.; Robert, C.A.M.; Spencer, J.L.; Lipka, A.E.; Schmelz, E.A. Selinene Volatiles Are Essential Precursors for Maize Defense Promoting Fungal Pathogen Resistance. *Plant Physiology* **2017**, *175*, 1455-1468, doi:10.1104/pp.17.00879.
40. Liang, J.; Liu, J.; Brown, R.; Jia, M.; Zhou, K.; Peters, R.J.; Wang, Q. Direct production of dihydroxylated sesquiterpenoids by a maize terpene synthase. *Plant Journal* **2018**, *94*, 847-856, doi:10.1111/tpj.13901.
41. Zhuang, X.; Koellner, T.G.; Zhao, N.; Li, G.; Jiang, Y.; Zhu, L.; Ma, J.; Degenhardt, J.; Chen, F. Dynamic evolution of herbivore-induced sesquiterpene biosynthesis in sorghum and related grass crops. *Plant Journal* **2012**, *69*, 70-80, doi:10.1111/j.1365-3113X.2011.04771.x.
42. Yu, F.; Okamoto, S.; Nakasone, K.; Adachi, K.; Matsuda, S.; Harada, H.; Misawa, N.; Utsumi, R. Molecular cloning and functional characterization of alpha-humulene synthase, a possible key enzyme of zerumbone biosynthesis in shampoo ginger (*Zingiber zerumbet* Smith). *Planta* **2008**, *227*, 1291-1299, doi:10.1007/s00425-008-0700-x.
43. Yu, F.; Harada, H.; Yamasaki, K.; Okamoto, S.; Hirase, S.; Tanaka, Y.; Misawa, N.; Utsumi, R. Isolation and functional characterization of a beta-eudesmol synthase, a new sesquiterpene synthase from *Zingiber zerumbet* Smith. *FEBS Letters* **2008**, *582*, 565-572, doi:10.1016/j.febslet.2008.01.020.
44. Fujisawa, M.; Harada, H.; Kenmoku, H.; Mizutani, S.; Misawa, N. Cloning and characterization of a novel gene that encodes (S)-beta-bisabolene synthase from ginger, *Zingiber officinale*. *Planta* **2010**, *232*, 121-130, doi:10.1007/s00425-010-1137-6.
45. Picaud, S.; Olsson, M.E.; Brodelius, M.; Brodelius, P.E. Cloning, expression, purification and characterization of recombinant (+)-germacrene D synthase from *Zingiber officinale*. *Archives of Biochemistry and Biophysics* **2006**, *452*, 17-28, doi:10.1016/j.abb.2006.06.007.
46. Koo, H.J.; Gang, D.R. Suites of Terpene Synthases Explain Differential Terpenoid Production in Ginger and Turmeric Tissues. *Plos One* **2012**, *7*, doi:10.1371/journal.pone.0051481.
47. Sun, J.; Cui, G.; Ma, X.; Zhan, Z.; Ma, Y.; Teng, Z.; Gao, W.; Wang, Y.; Chen, T.; Lai, C.; et al. An integrated strategy to identify genes responsible for sesquiterpene biosynthesis in turmeric. *Plant Molecular Biology* **2019**, *101*, 221-234, doi:10.1007/s11103-019-00892-0.
48. Hattan, J.-i.; Shindo, K.; Sasaki, T.; Misawa, N. Isolation and Functional Characterization of New Terpene Synthase Genes from Traditional Edible Plants. *Journal of Oleo Science* **2018**, *67*, 1235-1246, doi:10.5650/jos.ess18163.
49. Chuang, L.; Wen, C.-H.; Lee, Y.-R.; Lin, Y.-L.; Hsu, L.-R.; Wang, S.-Y.; Chu, F.-H. Identification, Functional Characterization, and Seasonal Expression Patterns of Five Sesquiterpene Synthases in *Liquidambar formosana*. *Journal of Natural Products* **2018**, *81*, 1162-1172, doi:10.1021/acs.jnatprod.7b00773.
50. Arimura, G.-I.; Garms, S.; Maffei, M.; Bossi, S.; Schulze, B.; Leitner, M.; Mithofer, A.; Boland, W. Herbivore-induced terpenoid emission in *Medicago truncatula*: concerted action of jasmonate, ethylene and calcium signaling. *Planta* **2008**, *227*, 453-464, doi:10.1007/s00425-007-0631-y.
51. Yadav, H.; Dreher, D.; Athmer, B.; Porzel, A.; Gavrin, A.; Baldermann, S.; Tissier, A.; Hause, B. *Medicago* TERPENE SYNTHASE 10 Is Involved in Defense Against an Oomycete Root Pathogen. *Plant Physiology* **2019**, *180*, 1598-1613, doi:10.1104/pp.19.00278.
52. Brillada, C.; Nishihara, M.; Shimoda, T.; Garms, S.; Boland, W.; Maffei, M.E.; Arimura, G.-i. Metabolic engineering of the C-16 homoterpene TMTT in *Lotus japonicus* through overexpression of (E,E)-geranylinalool synthase attracts generalist and specialist predators in different manners. *New Phytologist* **2013**, *200*, 1200-1211, doi:10.1111/nph.12442.
53. Li, F.; Li, W.; Lin, Y.-J.; Pickett, J.A.; Birkett, M.A.; Wu, K.; Wang, G.; Zhou, J.-J. Expression of lima bean terpene synthases in rice enhances recruitment of a beneficial enemy of a major rice pest. *Plant Cell and Environment* **2018**, *41*, 111-120, doi:10.1111/pce.12959.
54. Yu, N.; Yang, J.-C.; Yin, G.-T.; Li, R.-S.; Zou, W.-T. Transcriptome Analysis of Oleoresin-Producing Tree *Sindora Glabra* and Characterization of Sesquiterpene Synthases. *Frontiers in Plant Science* **2018**, *9*,

doi:10.3389/fpls.2018.01619.

55. Booth, J.K.; Page, J.E.; Bohlmann, J. Terpene synthases from *Cannabis sativa*. *Plos One* **2017**, *12*.
56. Zager, J.J.; Lange, I.; Srividya, N.; Smith, A.; Lange, B.M. Gene Networks Underlying Cannabinoid and Terpenoid Accumulation in Cannabis. *Plant Physiology* **2019**, *180*, 1877-1897, doi:10.1104/pp.18.01506.
57. Wang, G.; Tian, L.; Aziz, N.; Broun, P.; Dai, X.; He, J.; King, A.; Zhao, P.X.; Dixon, R.A. Terpene Biosynthesis in Glandular Trichomes of Hop. *Plant Physiology* **2008**, *148*, 1254-1266, doi:10.1104/pp.108.125187.
58. Nieuwenhuizen, N.J.; Green, S.A.; Chen, X.; Bailleul, E.J.D.; Matich, A.J.; Wang, M.Y.; Atkinson, R.G. Functional Genomics Reveals That a Compact Terpene Synthase Gene Family Can Account for Terpene Volatile Production in Apple. *Plant Physiology* **2013**, *161*, 787-804, doi:10.1104/pp.112.208249.
59. Magnard, J.-L.; Bony, A.R.; Bettini, F.; Campanaro, A.; Blerot, B.; Baudino, S.; Jullien, F. Linalool and linalool nerolidol synthases in roses, several genes for little scent. *Plant Physiology and Biochemistry* **2018**, *127*, 74-87, doi:10.1016/j.plaphy.2018.03.009.
60. Guterman, I.; Shalit, M.; Menda, N.; Piestun, D.; Dafny-Yelin, M.; Shalev, G.; Bar, E.; Davydov, O.; Ovadis, M.; Emanuel, M.; et al. Rose scent: Genomics approach to discovering novel floral fragrance-related genes. *Plant Cell* **2002**, *14*, 2325-2338, doi:10.1105/tpc.005207.
61. Aharoni, A.; Giri, A.P.; Verstappen, F.W.A.; Berteaux, C.M.; Sevenier, R.; Sun, Z.K.; Jongsma, M.A.; Schwab, W.; Bouwmeester, H.J. Gain and loss of fruit flavor compounds produced by wild and cultivated strawberry species. *Plant Cell* **2004**, *16*, 3110-3131, doi:10.1105/tpc.104.023895.
62. Nawade, B.; Yahyaa, M.; Reuveny, H.; Shaltiel-Harpaz, L.; Eisenbach, O.; Faigenboim, A.; Bar-Yaakov, I.; Holland, D.; Ibdah, M. Profiling of volatile terpenes from almond (*Prunus dulcis*) young fruits and characterization of seven terpene synthase genes. *Plant Science* **2019**, *287*, doi:10.1016/j.plantsci.2019.110187.
63. Portnoy, V.; Benyamini, Y.; Bar, E.; Harel-Beja, R.; Gepstein, S.; Giovannoni, J.J.; Schaffer, A.A.; Burger, J.; Tadmor, Y.; Lewinsohn, E.; et al. The molecular and biochemical basis for varietal variation in sesquiterpene content in melon (*Cucumis melo* L.) rinds. *Plant Molecular Biology* **2008**, *66*, 647-661, doi:10.1007/s11103-008-9296-6.
64. Mercke, P.; Kappers, I.F.; Verstappen, F.W.A.; Vorst, O.; Dicke, M.; Bouwmeester, H.J. Combined transcript and metabolite analysis reveals genes involved in spider mite induced volatile formation in cucumber plants. *Plant Physiology* **2004**, *135*, 2012-2024, doi:10.1104/pp.104.048116.
65. Tong, Y.-r.; Su, P.; Guan, H.-y.; Hu, T.-y.; Chen, J.-l.; Zhang, Y.-f.; Zhao, Y.-j.; Gao, L.-h.; Zhang, X.-n.; Huang, L.-q.; et al. Eudesmane-type sesquiterpene diols directly synthesized by a sesquiterpene cyclase in *Tripterygium wilfordii*. *Biochemical Journal* **2018**, *475*, 2713-2725, doi:10.1042/bcj20180353.
66. Hansen, N.L.; Heskes, A.M.; Hamberger, B.; Olsen, C.E.; Hallstrom, B.M.; Andersen-Ranberg, J.; Hamberger, B. The terpene synthase gene family in *Tripterygium wilfordii* harbors a labdane-type diterpene synthase among the monoterpene synthase TPS-b subfamily. *Plant Journal* **2017**, *89*, 429-441, doi:10.1111/tj.13410.
67. Su, P.; Hu, T.; Liu, Y.; Tong, Y.; Guan, H.; Zhang, Y.; Zhou, J.; Huang, L.; Gao, W. Functional characterization of NES and GES responsible for the biosynthesis of (E)-nerolidol and (E, E)-geranylinalool in *Tripterygium wilfordii*. *Scientific Reports* **2017**, *7*, doi:10.1038/srep40851.
68. Irmisch, S.; Jiang, Y.; Chen, F.; Gershenzon, J.; Koellner, T.G. Terpene synthases and their contribution to herbivore-induced volatile emission in western balsam poplar (*Populus trichocarpa*). *Bmc Plant Biology* **2014**, *14*, doi:10.1186/s12870-014-0270-y.
69. Danner, H.; Boeckler, G.A.; Irmisch, S.; Yuan, J.S.; Chen, F.; Gershenzon, J.; Unsicker, S.B.; Koellner, T.G. Four terpene synthases produce major compounds of the gypsy moth feeding-induced volatile blend of *Populus trichocarpa*. *Phytochemistry* **2011**, *72*, 897-908, doi:10.1016/j.phytochem.2011.03.014.
70. Arimura, G.; Huber, D.P.W.; Bohlmann, J. Forest tent caterpillars (*Malacosoma disstria*) induce local and systemic diurnal emissions of terpenoid volatiles in hybrid poplar (*Populus trichocarpa* x *deltoides*): cDNA cloning, functional characterization, and patterns of gene expression of (-)-germacrene D synthase, PtdTPS1. *Plant Journal* **2004**, *37*, 603-616, doi:10.1111/j.1365-313X.2003.01987.x.
71. Xie, X.; Kirby, J.; Keasling, J.D. Functional characterization of four sesquiterpene synthases from *Ricinus communis* (Castor bean). *Phytochemistry* **2012**, *78*, 20-28, doi:10.1016/j.phytochem.2012.02.022.
72. He, S.-M.; Wang, X.; Yang, S.-C.; Dong, Y.; Zhao, Q.-M.; Yang, J.-L.; Cong, K.; Zhang, J.-J.; Zhang, G.-H.; Wang, Y.; et al. De novo Transcriptome Characterization of *Rhodomyrtus tomentosa* Leaves and Identification of Genes Involved in alpha/beta-Pinene and beta-Caryophyllene Biosynthesis. *Frontiers in Plant Science* **2018**, *9*, doi:10.3389/fpls.2018.01231.
73. Blerot, B.; Martinelli, L.; Prunier, C.; Saint-Marcoux, D.; Legrand, S.; Bony, A.; Sarabere, L.; Gros, F.; Boyer, N.; Caissard, J.-C.; et al. Functional Analysis of Four Terpene Synthases in Rose-Scented Pelargonium



- Cultivars (*Pelargonium x hybridum*) and Evolution of Scent in the *Pelargonium* Genus. *Frontiers in Plant Science* **2018**, 9, doi:10.3389/fpls.2018.01435.
74. Meena, S.; Kumar, S.R.; Dwivedi, V.; Singh, A.K.; Chanotiya, C.S.; Akhtar, M.Q.; Kumar, K.; Shasany, A.K.; Nagegowda, D.A. Transcriptomic insight into terpenoid and carbazole alkaloid biosynthesis, and functional characterization of two terpene synthases in curry tree (*Murraya koenigii*). *Scientific Reports* **2017**, 7, doi:10.1038/srep44126.
  75. Hsu, C.-Y.; Huang, P.-L.; Chen, C.-M.; Mao, C.-T.; Chaw, S.-M. Tangy Scent in *Toona sinensis* (Meliaceae) Leaflets: Isolation, Functional Characterization, and Regulation of TsTPS1 and TsTPS2, Two Key Terpene Synthase Genes in the Biosynthesis of the Scent Compound. *Current Pharmaceutical Biotechnology* **2012**, 13, 2721-2732, doi:10.2174/138920112804724864.
  76. Sharon-Asa, L.; Shalit, M.; Frydman, A.; Bar, E.; Holland, D.; Or, E.; Lavi, U.; Lewinsohn, E.; Eyal, Y. Citrus fruit flavor and aroma biosynthesis: isolation, functional characterization, and developmental regulation of Cstps1, a key gene in the production of the sesquiterpene aroma compound valencene. *Plant Journal* **2003**, 36, 664-674, doi:10.1046/j.1365-313X.2003.01910.x.
  77. Alquezar, B.; Rodriguez, A.; de la Pena, M.; Pena, L. Genomic Analysis of Terpene Synthase Family and Functional Characterization of Seven Sesquiterpene Synthases from *Citrus sinensis*. *Frontiers in Plant Science* **2017**, 8, doi:10.3389/fpls.2017.01481.
  78. Shimada, T.; Endo, T.; Fujii, H.; Rodriguez, A.; Pena, L.; Omura, M. Characterization of three linalool synthase genes from *Citrus unshiu* Marc. and analysis of linalool-mediated resistance against *Xanthomonas citri* subsp *citri* and *Penicillium italicum* in citrus leaves and fruits. *Plant Science* **2014**, 229, 154-166, doi:10.1016/j.plantsci.2014.09.008.
  79. Uji, Y.; Ozawa, R.; Shishido, H.; Taniguchi, S.; Takabayashi, J.; Akimitsu, K.; Gomi, K. Isolation of a sesquiterpene synthase expressing in specialized epithelial cells surrounding the secretory cavities in rough lemon (*Citrus jambhiri*). *Journal of Plant Physiology* **2015**, 180, 67-71, doi:10.1016/j.jplph.2015.03.013.
  80. Maruyama, T.; Ito, M.; Honda, G. Molecular cloning, functional expression and characterization of (E)-beta-farnesene synthase from *Citrus junos*. *Biological & Pharmaceutical Bulletin* **2001**, 24, 1171-1175, doi:10.1248/bpb.24.1171.
  81. Fujita, Y.; Koeduka, T.; Aida, M.; Suzuki, H.; Iijima, Y.; Matsui, K. Biosynthesis of volatile terpenes that accumulate in the secretory cavities of young leaves of Japanese pepper (*Zanthoxylum piperitum*): Isolation and functional characterization of monoterpene and sesquiterpene synthase genes. *Plant Biotechnology* **2017**, 34, 17-+, doi:10.5511/plantbiotechnology.16.1231a.
  82. Abel, C.; Clauss, M.; Schaub, A.; Gershenzon, J.; Tholl, D. Floral and insect-induced volatile formation in *Arabidopsis lyrata* ssp *petraea*, a perennial, outcrossing relative of *A.thaliana*. *Planta* **2009**, 230, 1-11, doi:10.1007/s00425-009-0921-7.
  83. Chen, F.; Tholl, D.; D'Auria, J.C.; Farooq, A.; Pichersky, E.; Gershenzon, J. Biosynthesis and emission of terpenoid volatiles from *Arabidopsis* flowers. *Plant Cell* **2003**, 15, 481-494, doi:10.1105/tpc.007989.
  84. Tholl, D.; Chen, F.; Petri, J.; Gershenzon, J.; Pichersky, E. Two sesquiterpene synthases are responsible for the complex mixture of sesquiterpenes emitted from *Arabidopsis* flowers. *Plant Journal* **2005**, 42, 757-771, doi:10.1111/j.1365-313X.2005.02417.x.
  85. Ro, D.-K.; Ehrling, J.; Keeling, C.I.; Lin, R.; Mattheus, N.; Bohlmann, J. Microarray expression profiling and functional characterization of AtTPS genes: Duplicated *Arabidopsis thaliana* sesquiterpene synthase genes At4g13280 and At4g13300 encode root-specific and wound-inducible (Z)-gamma-bisabolene synthases. *Archives of Biochemistry and Biophysics* **2006**, 448, 104-116, doi:10.1016/j.abb.2005.09.019.
  86. Lee, J.-B.; Hirohashi, S.; Yamamura, Y.; Taura, F.; Kurosaki, F. Induction, Cloning and Functional Expression of a Sesquiterpene Biosynthetic Enzyme, delta-Guaiene Synthase, of *Aquilaria microcarpa* Cell Cultures. *Natural Product Communications* **2014**, 9, 1231-1235.
  87. Xu, Y.; Zhang, Z.; Wang, M.; Wei, J.; Chen, H.; Gao, Z.; Sui, C.; Luo, H.; Zhang, X.; Yang, Y.; et al. Identification of genes related to agarwood formation: transcriptome analysis of healthy and wounded tissues of *Aquilaria sinensis*. *Bmc Genomics* **2013**, 14, doi:10.1186/1471-2164-14-227.
  88. Ye, W.; He, X.; Wu, H.; Wang, L.; Zhang, W.; Fan, Y.; Li, H.; Liu, T.; Gao, X. Identification and characterization of a novel sesquiterpene synthase from *Aquilaria sinensis*: An important gene for agarwood formation. *International Journal of Biological Macromolecules* **2018**, 108, 884-892, doi:10.1016/j.ijbiomac.2017.10.183.
  89. Kumeta, Y.; Ito, M. Characterization of delta-Guaiene Synthases from Cultured Cells of *Aquilaria*, Responsible for the Formation of the Sesquiterpenes in Agarwood. *Plant Physiology* **2010**, 154, 1998-2007, doi:10.1104/pp.110.161828.
  90. Kumeta, Y.; Ito, M. Characterization of alpha-humulene synthases responsible for the production of

- sesquiterpenes induced by methyl jasmonate in *Aquilaria* cell culture. *Journal of Natural Medicines* **2016**, *70*, 452-459, doi:10.1007/s11418-016-0999-8.
91. Martin, D.M.; Toub, O.; Chiang, A.; Lo, B.C.; Ohse, S.; Lund, S.T.; Bohlmann, J. The bouquet of grapevine (*Vitis vinifera* L. cv. Cabernet Sauvignon) flowers arises from the biosynthesis of sesquiterpene volatiles in pollen grains. *P Natl Acad Sci USA* **2009**, *106*, 7245-7250, doi:10.1073/pnas.0901387106.
  92. Lucker, J.; Bowen, P.; Bohlmann, J. *Vitis vinifera* terpenoid cyclases: functional identification of two sesquiterpene synthase cDNAs encoding (+)-valencene synthase and (-)-germacrene D synthase and expression of mono- and sesquiterpene synthases in grapevine flowers and berries. *Phytochemistry* **2004**, *65*, 2649-2659, doi:10.1016/j.phytochem.2004.08.017.
  93. Martin, D.M.; Aubourg, S.; Schouwey, M.B.; Daviet, L.; Schalk, M.; Toub, O.; Lund, S.T.; Bohlmann, J. Functional Annotation, Genome Organization and Phylogeny of the Grapevine (*Vitis vinifera*) Terpene Synthase Gene Family Based on Genome Assembly, FLcDNA Cloning, and Enzyme Assays. *Bmc Plant Biology* **2010**, *10*, doi:10.1186/1471-2229-10-226.
  94. Dueholm, B.; Drew, D.P.; Sweetman, C.; Simonsen, H.T. In planta and in silico characterization of five sesquiterpene synthases from *Vitis vinifera* (cv. Shiraz) berries. *Planta* **2019**, *249*, 59-70, doi:10.1007/s00425-018-2986-7.
  95. Falara, V.; Fotopoulos, V.; Margaritis, T.; Anastasaki, T.; Pateraki, I.; Bosabalidis, A.M.; Kafetzopoulos, D.; Demetzos, C.; Pichersky, E.; Kanellis, A.K. Transcriptome analysis approaches for the isolation of trichome-specific genes from the medicinal plant *Cistus creticus* subsp. *creticus*. *Plant Molecular Biology* **2008**, *68*, 633-651, doi:10.1007/s11103-008-9399-0.
  96. Yang, C.-Q.; Wu, X.-M.; Ruan, J.-X.; Hu, W.-L.; Mao, Y.-B.; Chen, X.-Y.; Wang, L.-J. Isolation and characterization of terpene synthases in cotton (*Gossypium hirsutum*). *Phytochemistry* **2013**, *96*, 46-56, doi:10.1016/j.phytochem.2013.09.009.
  97. Chen, X.Y.; Chen, Y.; Heinsteins, P.; Davisson, V.J. Cloning, expression, and characterization of (+)-delta-cadinene synthase: a catalyst for cotton phytoalexin biosynthesis. *Archives of biochemistry and biophysics* **1995**, *324*, 255-266, doi:10.1006/abbi.1995.0038.
  98. Chen, X.Y.; Wang, M.; Chen, Y.; Davisson, V.J.; Heinsteins, P. Cloning and heterologous expression of a second (+)-delta-cadinene synthase from *Gossypium arboreum*. *Journal of natural products* **1996**, *59*, 944-951, doi:10.1021/np960344w.
  99. Srivastava, P.L.; Daramwar, P.P.; Krithika, R.; Pandreka, A.; Shankar, S.S.; Thulasiram, H.V. Functional Characterization of Novel Sesquiterpene Synthases from Indian Sandalwood, *Santalum album*. *Scientific Reports* **2015**, *5*, doi:10.1038/srep10095.
  100. Jones, C.G.; Keeling, C.I.; Ghisalberti, E.L.; Barbour, E.L.; Plummer, J.A.; Bohlmann, J. Isolation of cDNAs and functional characterisation of two multi-product terpene synthase enzymes from sandalwood, *Santalum album* L. *Archives of Biochemistry and Biophysics* **2008**, *477*, 121-130, doi:10.1016/j.abb.2008.05.008.
  101. Zhang, X.; Niu, M.; da Silva, J.A.T.; Zhang, Y.; Yuan, Y.; Jia, Y.; Xiao, Y.; Li, Y.; Fang, L.; Zeng, S.; et al. Identification and functional characterization of three new terpene synthase genes involved in chemical defense and abiotic stresses in *Santalum album*. *Bmc Plant Biology* **2019**, *19*, doi:10.1186/s12870-019-1720-3.
  102. Moniodis, J.; Jones, C.G.; Barbour, E.L.; Plummer, J.A.; Ghisalberti, E.L.; Bohlmann, J. The transcriptome of sesquiterpenoid biosynthesis in heartwood xylem of Western Australian sandalwood (*Santalum spicatum*). *Phytochemistry* **2015**, *113*, 79-86, doi:10.1016/j.phytochem.2014.12.009.
  103. Jones, C.G.; Moniodis, J.; Zulak, K.G.; Scaffidi, A.; Plummer, J.A.; Ghisalberti, E.L.; Barbour, E.L.; Bohlmann, J. Sandalwood Fragrance Biosynthesis Involves Sesquiterpene Synthases of Both the Terpene Synthase (TPS)-a and TPS-b Subfamilies, including Santalene Synthases. *Journal of Biological Chemistry* **2011**, *286*, 17445-17454, doi:10.1074/jbc.M111.231787.
  104. Ker, D.-S.; Pang, S.L.; Othman, N.F.; Kumaran, S.; Tan, E.F.; Krishnan, T.; Chan, K.G.; Othman, R.; Hassan, M.; Ng, C.L. Purification and biochemical characterization of recombinant *Persicaria minor* beta-sesquiphellandrene synthase. *Peerj* **2017**, *5*, doi:10.7717/peerj.2961.
  105. Rusdi, N.A.; Goh, H.-H.; Sabri, S.; Ramzi, A.B.; Noor, N.M.; Baharum, S.N. Functional Characterisation of New Sesquiterpene Synthase from the Malaysian Herbal Plant, *Polygonum Minus*. *Molecules* **2018**, *23*, doi:10.3390/molecules23061370.
  106. Henquet, M.G.L.; Protá, N.; van der Hooft, J.J.J.; Varbanova-Herde, M.; Hulzink, R.J.M.; de Vos, M.; Prins, M.; de Both, M.T.J.; Franssen, M.C.R.; Bouwmeester, H.; et al. Identification of a drimenol synthase and drimenol oxidase from *Persicaria hydropiper*, involved in the biosynthesis of insect deterrent drimanes. *Plant Journal* **2017**, *90*, 1052-1063, doi:10.1111/tpj.13527.
  107. Zhou, Y.; Zeng, L.; Liu, X.; Gui, J.; Mei, X.; Fu, X.; Dong, F.; Tang, J.; Zhang, L.; Yang, Z. Formation of (E)-

- nerolidol in tea (*Camellia sinensis*) leaves exposed to multiple stresses during tea manufacturing. *Food Chemistry* **2017**, 231, 78-86, doi:10.1016/j.foodchem.2017.03.122.
108. Liu, G.-F.; Liu, J.-J.; He, Z.-R.; Wang, F.-M.; Yang, H.; Yan, Y.-F.; Gao, M.-J.; Gruber, M.Y.; Wan, X.-C.; Wei, S. Implementation of CsLIS/NES in linalool biosynthesis involves transcript splicing regulation in *Camellia sinensis*. *Plant Cell and Environment* **2018**, 41, 176-186, doi:10.1111/pce.13080.
  109. Wang, X.; Zeng, L.; Liao, Y.; Li, J.; Tang, J.; Yang, Z. Formation of alpha-Farnesene in Tea (*Camellia sinensis*) Leaves Induced by Herbivore-Derived Wounding and Its Effect on Neighboring Tea Plants. *International Journal of Molecular Sciences* **2019**, 20, doi:10.3390/ijms20174151.
  110. Hattar, J.-i.; Shindo, K.; Ito, T.; Shibuya, Y.; Watanabe, A.; Tagaki, C.; Ohno, F.; Sasaki, T.; Ishii, J.; Kondo, A.; et al. Identification of a novel hedycaryol synthase gene isolated from *Camellia brevistyla* flowers and floral scent of *Camellia* cultivars. *Planta* **2016**, 243, 959-972, doi:10.1007/s00425-015-2454-6.
  111. Nieuwenhuizen, N.J.; Wang, M.Y.; Matich, A.J.; Green, S.A.; Chen, X.; Yauk, Y.-K.; Beuning, L.L.; Nagegowda, D.A.; Dudareva, N.; Atkinson, R.G. Two terpene synthases are responsible for the major sesquiterpenes emitted from the flowers of kiwifruit (*Actinidia deliciosa*). *Journal of Experimental Botany* **2009**, 60, 3203-3219, doi:10.1093/jxb/erp162.
  112. Green, S.A.; Chen, X.; Nieuwenhuizen, N.J.; Matich, A.J.; Wang, M.Y.; Bunn, B.J.; Yauk, Y.-K.; Atkinson, R.G. Identification, functional characterization, and regulation of the enzyme responsible for floral (E)-nerolidol biosynthesis in kiwifruit (*Actinidia chinensis*). *Journal of Experimental Botany* **2012**, 63, 1951-1967, doi:10.1093/jxb/err393.
  113. Iijima, Y.; Davidovich-Rikanati, R.; Fridman, E.; Gang, D.R.; Bar, E.; Lewinsohn, E.; Pichersky, E. The biochemical and molecular basis for the divergent patterns in the biosynthesis of terpenes and phenylpropanes in the peltate glands of three cultivars of basil. *Plant Physiology* **2004**, 136, 3724-3736, doi:10.1104/pp.104.051318.
  114. Landmann, C.; Fink, B.; Festner, M.; Dregus, M.; Engel, K.-H.; Schwab, W. Cloning and functional characterization of three terpene synthases from lavender (*Lavandula angustifolia*). *Archives of Biochemistry and Biophysics* **2007**, 465, 417-429, doi:10.1016/j.abb.2007.06.011.
  115. Jullien, F.; Moja, S.; Bony, A.; Legrand, S.; Petit, C.; Benabdelkader, T.; Poirot, K.; Fiorucci, S.; Guitton, Y.; Nicole, F.; et al. Isolation and functional characterization of a tau-cadinol synthase, a new sesquiterpene synthase from *Lavandula angustifolia*. *Plant Molecular Biology* **2014**, 84, 227-241, doi:10.1007/s11103-013-0131-3.
  116. Sarker, L.S.; Demissie, Z.A.; Mahmoud, S.S. Cloning of a sesquiterpene synthase from *Lavandula x intermedia* glandular trichomes. *Planta* **2013**, 238, 983-989, doi:10.1007/s00425-013-1937-6.
  117. Benabdelkader, T.; Guitton, Y.; Pasquier, B.; Magnard, J.L.; Jullien, F.; Kameli, A.; Legendre, L. Functional characterization of terpene synthases and chemotypic variation in three lavender species of section *Stoechas*. *Physiologia Plantarum* **2015**, 153, 43-57, doi:10.1111/ppl.12241.
  118. Luo, F.; Ling, Y.; Li, D.-S.; Tang, T.; Liu, Y.-C.; Liu, Y.; Li, S.-H. Characterization of a sesquiterpene cyclase from the glandular trichomes of *Leucoscepttrum canum* for sole production of cedrol in *Escherichia coli* and *Nicotiana benthamiana*. *Phytochemistry* **2019**, 162, 121-128, doi:10.1016/j.phytochem.2019.03.009.
  119. Crocoll, C.; Asbach, J.; Novak, J.; Gershenzon, J.; Degenhardt, J. Terpene synthases of oregano (*Origanum vulgare* L.) and their roles in the pathway and regulation of terpene biosynthesis. *Plant Molecular Biology* **2010**, 73, 587-603, doi:10.1007/s11103-010-9636-1.
  120. Crock, J.; Wildung, M.; Croteau, R. Isolation and bacterial expression of a sesquiterpene synthase cDNA clone from peppermint (*Mentha x piperita*, L.) that produces the aphid alarm pheromone (E)-beta-farnesene. *P Natl Acad Sci USA* **1997**, 94, 12833-12838, doi:10.1073/pnas.94.24.12833.
  121. Prosser, I.M.; Adams, R.J.; Beale, M.H.; Hawkins, N.D.; Phillips, A.L.; Pickett, J.A.; Field, L.M. Cloning and functional characterisation of a cis-muroladiene synthase from black peppermint (*Mentha x piperita*) and direct evidence for a chemotype unable to synthesise farnesene. *Phytochemistry* **2006**, 67, 1564-1571, doi:10.1016/j.phytochem.2005.06.012.
  122. Deguerry, F.; Pastore, L.; Wu, S.; Clark, A.; Chappell, J.; Schalk, M. The diverse sesquiterpene profile of patchouli, *Pogostemon cablin*, is correlated with a limited number of sesquiterpene synthases. *Archives of Biochemistry and Biophysics* **2006**, 454, 123-136, doi:10.1016/j.abb.2006.08.006.
  123. Hartwig, S.; Frister, T.; Alemdar, S.; Li, Z.; Krings, U.; Berger, R.G.; Scheper, T.; Beutel, S. Expression, purification and activity assay of a patchoulol synthase cDNA variant fused to thioredoxin in *Escherichia coli*. *Protein Expression and Purification* **2014**, 97, 61-71, doi:10.1016/j.pep.2014.02.003.
  124. Zeng, X.; Liu, C.; Zheng, R.; Cai, X.; Luo, J.; Zou, J.; Wang, C. Emission and Accumulation of Monoterpene and the Key Terpene Synthase (TPS) Associated with Monoterpene Biosynthesis in *Osmanthus fragrans* Lour. *Frontiers in Plant Science* **2016**, 6, doi:10.3389/fpls.2015.01232.

125. Nagegowda, D.A.; Gutensohn, M.; Wilkerson, C.G.; Dudareva, N. Two nearly identical terpene synthases catalyze the formation of nerolidol and linalool in snapdragon flowers. *Plant Journal* **2008**, *55*, 224-239, doi:10.1111/j.1365-3113X.2008.03496.x.
126. Attia, M.; Kim, S.-U.; Ro, D.-K. Molecular cloning and characterization of (+)-epi- $\alpha$ -bisabolol synthase, catalyzing the first step in the biosynthesis of the natural sweetener, hernandulcin, in *Lippia dulcis*. *Archives of Biochemistry and Biophysics* **2012**, *527*, 37-44, doi:10.1016/j.abb.2012.07.010.
127. Sallaud, C.; Rontein, D.; Onillon, S.; Jabes, F.; Duffe, P.; Giacalone, C.; Thoraval, S.; Escoffier, C.; Herbette, G.; Leonhardt, N.; et al. A Novel Pathway for Sesquiterpene Biosynthesis from Z,Z-Farnesyl Pyrophosphate in the Wild Tomato *Solanum habrochaites*. *Plant Cell* **2009**, *21*, 301-317, doi:10.1105/tpc.107.057885.
128. Bleeker, P.M.; Spyropoulou, E.A.; Diergaarde, P.J.; Volpin, H.; De Both, M.T.J.; Zerbe, P.; Bohlmann, J.; Falara, V.; Matsuba, Y.; Pichersky, E.; et al. RNA-seq discovery, functional characterization, and comparison of sesquiterpene synthases from *Solanum lycopersicum* and *Solanum habrochaites* trichomes. *Plant Molecular Biology* **2011**, *77*, 323-336, doi:10.1007/s11103-011-9813-x.
129. van der Hoeven, R.S.; Monforte, A.J.; Breeden, D.; Tanksley, S.D.; Steffens, J.C. Genetic control and evolution of sesquiterpene biosynthesis in *Lycopersicon esculentum* and *L. hirsutum*. *Plant Cell* **2000**, *12*, 2283-2294, doi:10.1105/tpc.12.11.2283.
130. Gonzales-Vigil, E.; Hufnagel, D.E.; Kim, J.; Last, R.L.; Barry, C.S. Evolution of TPS20-related terpene synthases influences chemical diversity in the glandular trichomes of the wild tomato relative *Solanum habrochaites*. *Plant Journal* **2012**, *71*, 921-935, doi:10.1111/j.1365-3113X.2012.05040.x.
131. Falara, V.; Akhtar, T.A.; Nguyen, T.T.H.; Spyropoulou, E.A.; Bleeker, P.M.; Schauvinhold, I.; Matsuba, Y.; Bonini, M.E.; Schilmiller, A.L.; Last, R.L.; et al. The Tomato Terpene Synthase Gene Family. *Plant Physiology* **2011**, *157*, 770-789, doi:10.1104/pp.111.179648.
132. Colby, S.M.; Crock, J.; Dowdle-Rizzo, B.; Lemaux, P.G.; Croteau, R. Germacrene C synthase from *Lycopersicon esculentum* cv. VFNT Cherry tomato: cDNA isolation, characterization, and bacterial expression of the multiple product sesquiterpene cyclase. *P Natl Acad Sci USA* **1998**, *95*, 2216-2221, doi:10.1073/pnas.95.5.2216.
133. Tsaballa, A.; Nikolaidis, A.; Trikka, F.; Ignea, C.; Kampranis, S.C.; Makris, A.M.; Argiriou, A. Use of the de novo transcriptome analysis of silver-leaf nightshade (*Solanum elaeagnifolium*) to identify gene expression changes associated with wounding and terpene biosynthesis. *Bmc Genomics* **2015**, *16*, doi:10.1186/s12864-015-1738-3.
134. Back, K.; Chappell, J. Cloning and bacterial expression of a sesquiterpene cyclase from *Hyoscyamus muticus* and its molecular comparison to related terpene cyclases. *The Journal of biological chemistry* **1995**, *270*, 7375-7381, doi:10.1074/jbc.270.13.7375.
135. Back, K.W.; He, S.L.; Kim, K.U.; Shin, D.H. Cloning and bacterial expression of sesquiterpene cyclase, a key branch point enzyme for the synthesis of sesquiterpenoid phytoalexin capsidiol in UV-challenged leaves of *Capsicum annuum*. *Plant and Cell Physiology* **1998**, *39*, 899-904, doi:10.1093/oxfordjournals.pcp.a029452.
136. Wu, S.Q.; Schoenbeck, M.A.; Greenhagen, B.T.; Takahashi, S.; Lee, S.B.; Coates, R.M.; Chappell, J. Surrogate splicing for functional analysis of sesquiterpene synthase genes. *Plant Physiology* **2005**, *138*, 1322-1333, doi:10.1104/pp.105.059386.
137. Back, K.; Yin, S.; Chappell, J. Expression of a plant sesquiterpene cyclase gene in *Escherichia coli*. *Archives of biochemistry and biophysics* **1994**, *315*, 527-532, doi:10.1006/abbi.1994.1533.
138. Bohlmann, J.; Stauber, E.J.; Krock, B.; Oldham, N.J.; Gershenzon, J.; Baldwin, I.T. Gene expression of 5-epi-aristolochene synthase and formation of capsidiol in roots of *Nicotiana attenuata* and *N. sylvestris*. *Phytochemistry* **2002**, *60*, 109-116, doi:10.1016/s0031-9422(02)00080-8.
139. Son, Y.-J.; Kwon, M.; Ro, D.-K.; Kim, S.-U. Enantioselective microbial synthesis of the indigenous natural product (-)- $\alpha$ -bisabolol by a sesquiterpene synthase from chamomile (*Matricaria recutita*). *Biochemical Journal* **2014**, *463*, 239-248, doi:10.1042/bj20140306.
140. Irmisch, S.; Krause, S.T.; Kunert, G.; Gershenzon, J.; Degenhardt, J.; Koellner, T.G. The organ-specific expression of terpene synthase genes contributes to the terpene hydrocarbon composition of chamomile essential oils. *Bmc Plant Biology* **2012**, *12*, doi:10.1186/1471-2229-12-84.
141. Su, S.; Liu, X.; Pan, G.; Hou, X.; Zhang, H.; Yuan, Y. In vitro characterization of a (E)- $\beta$ -farnesene synthase from *Matricaria recutita* L. and its up-regulation by methyl jasmonate. *Gene* **2015**, *571*, 58-64, doi:10.1016/j.gene.2015.06.037.
142. Prosser, I.; Phillips, A.L.; Gittings, S.; Lewis, M.J.; Hooper, A.M.; Pickett, J.A.; Beale, M.H. (+)-(10R)-germacrene A synthase from goldenrod, *Solidago canadensis*; cDNA isolation, bacterial expression and

- functional analysis. *Phytochemistry* **2002**, *60*, 691-702, doi:10.1016/s0031-9422(02)00165-6.
143. Prosser, I.; Altug, I.G.; Phillips, A.L.; Konig, W.A.; Bouwmeester, H.J.; Beale, M.H. Enantiospecific (+)- and (-)-germacrene D synthases, cloned from goldenrod, reveal a functionally active variant of the universal isoprenoid-biosynthesis aspartate-rich motif. *Archives of Biochemistry and Biophysics* **2004**, *432*, 136-144, doi:10.1016/j.abb.2004.06.030.
  144. Kim, M.Y.; Chang, Y.J.; Bang, M.H.; Baek, N.I.; Jin, J.; Lee, C.H.; Kim, S.U. cDNA isolation and characterization of (+)-germacrene A synthase from *Ixeris dentata* form. *albiflora* Hara. *Journal of Plant Biology* **2005**, *48*, 178-186, doi:10.1007/bf03030406.
  145. Trinh-Don, N.; Faraldos, J.A.; Vardakou, M.; Salmon, M.; O'Maille, P.E.; Ro, D.-K. Discovery of germacrene A synthases in *Barnadesia spinosa*: The first committed step in sesquiterpene lactone biosynthesis in the basal member of the Asteraceae. *Biochemical and Biophysical Research Communications* **2016**, *479*, 622-627, doi:10.1016/j.bbrc.2016.09.165.
  146. Huber, M.; Epping, J.; Gronover, C.S.; Fricke, J.; Aziz, Z.; Brillatz, T.; Swyers, M.; Koellner, T.G.; Vogel, H.; Hammerbacher, A.; et al. A Latex Metabolite Benefits Plant Fitness under Root Herbivore Attack. *Plos Biology* **2016**, *14*, doi:10.1371/journal.pbio.1002332.
  147. Ramirez, A.M.; Saillard, N.; Yang, T.; Franssen, M.C.R.; Bouwmeester, H.J.; Jongsma, M.A. Biosynthesis of Sesquiterpene Lactones in *Pyrethrum* (*Tanacetum cinerariifolium*). *Plos One* **2013**, *8*, doi:10.1371/journal.pone.0065030.
  148. Majdi, M.; Liu, Q.; Karimzadeh, G.; Malboobi, M.A.; Beekwilder, J.; Cankar, K.; de Vos, R.; Todorovic, S.; Simonovic, A.; Bouwmeester, H. Biosynthesis and localization of parthenolide in glandular trichomes of feverfew (*Tanacetum parthenium* L. Schulz Bip.). *Phytochemistry* **2011**, *72*, 1739-1750, doi:10.1016/j.phytochem.2011.04.021.
  149. Alves Gomes Albertti, L.; Delatte, T.L.; Souza de Farias, K.; Galdi Boaretto, A.; Verstappen, F.; van Houwelingen, A.; Cankar, K.; Carollo, C.A.; Bouwmeester, H.J.; Beekwilder, J. Identification of the Bisabolol Synthase in the Endangered Candeia Tree (*Eremanthus erythropappus* (DC) McLeisch). *Frontiers in plant science* **2018**, *9*, 1340-1340, doi:10.3389/fpls.2018.01340.
  150. Bouwmeester, H.J.; Kodde, J.; Verstappen, F.W.A.; Altug, I.G.; de Kraker, J.W.; Wallaart, T.E. Isolation and characterization of two germacrene A synthase cDNA clones from chicory. *Plant Physiology* **2002**, *129*, 134-144, doi:10.1104/pp.001024.
  151. Bennett, M.H.; Mansfield, J.W.; Lewis, M.J.; Beale, M.H. Cloning and expression of sesquiterpene synthase genes from lettuce (*Lactuca sativa* L.). *Phytochemistry* **2002**, *60*, 255-261, doi:10.1016/s0031-9422(02)00103-6.
  152. Aschenbrenner, A.-K.; Kwon, M.; Conrad, J.; Ro, D.-K.; Spring, O. Identification and characterization of two bisabolene synthases from linear glandular trichomes of sunflower (*Helianthus annuus* L., Asteraceae). *Phytochemistry* **2016**, *124*, 29-37, doi:10.1016/j.phytochem.2016.01.009.
  153. Goepfert, J.C.; MacNevin, G.; Ro, D.-K.; Spring, O. Identification, functional characterization and developmental regulation of sesquiterpene synthases from sunflower capitula glandular trichomes. *Bmc Plant Biology* **2009**, *9*, doi:10.1186/1471-2229-9-86.
  154. Goepfert, J.; Buelow, A.-K.; Spring, O. Identification and Functional Characterization of a new Sunflower Germacrene A Synthase (HaGAS3). *Natural Product Communications* **2010**, *5*, 709-715.
  155. Li, Y.; Chen, F.; Li, Z.; Li, C.; Zhang, Y. Identification and Functional Characterization of Sesquiterpene Synthases from *Xanthium strumarium*. *Plant and Cell Physiology* **2016**, *57*, 630-641, doi:10.1093/pcp/pcw019.
  156. Gfeller, V.; Huber, M.; Foerster, C.; Huang, W.; Koellner, T.G.; Erb, M. Root volatiles in plant-plant interactions I: High root sesquiterpene release is associated with increased germination and growth of plant neighbours. *Plant Cell and Environment* **2019**, *42*, 1950-1963, doi:10.1111/pce.13532.
  157. Pazouki, L.; Memari, H.R.; Kaennaste, A.; Bichele, R.; Niinemets, U. Germacrene A synthase in yarrow (*Achillea millefolium*) is an enzyme with mixed substrate specificity: gene cloning, functional characterization and expression analysis. *Frontiers in Plant Science* **2015**, *6*, doi:10.3389/fpls.2015.00111.
  158. Shen, Q.-Q.; Wang, L.-P.; Liang, J.; Liu, L.-J.; Wang, Q. Functional characterization of SsNES responsible for nerolidol biosynthesis in *Senecio scandens*. *China journal of Chinese materia medica* **2019**, *44*, 1334-1340, doi:10.19540/j.cnki.cjcmm.20181204.009.
  159. Menin, B.; Comino, C.; Portis, E.; Moglia, A.; Cankar, K.; Bouwmeester, H.J.; Lanteri, S.; Beekwilder, J. Genetic mapping and characterization of the globe artichoke (+)-germacrene A synthase gene, encoding the first dedicated enzyme for biosynthesis of the bitter sesquiterpene lactone cynaropicrin. *Plant Science* **2012**, *190*, 1-8, doi:10.1016/j.plantsci.2012.03.006.
  160. Yahyaa, M.; Tholl, D.; Cormier, G.; Jensen, R.; Simon, P.W.; Ibdah, M. Identification and Characterization

- of Terpene Synthases Potentially Involved in the Formation of Volatile Terpenes in Carrot (*Daucus carota* L.) Roots. *J Agr Food Chem* **2015**, 63, 4870-4878, doi:10.1021/acs.jafc.5b00546.
161. Muangphrom, P.; Seki, H.; Suzuki, M.; Komori, A.; Nishiwaki, M.; Mikawa, R.; Fukushima, E.O.; Muranaka, T. Functional Analysis of Amorpha-4,11-Diene Synthase (ADS) Homologs from Non-Artemisinin-Producing *Artemisia* Species: The Discovery of Novel Koidzumiol and (+)-alpha-Bisabolol Synthases. *Plant and Cell Physiology* **2016**, 57, 1678-1688, doi:10.1093/pcp/pcw094.
  162. Muangphrom, P.; Seki, H.; Matsumoto, S.; Nishiwaki, M.; Fukushima, E.O.; Muranaka, T. Identification and characterization of a novel sesquiterpene synthase, 4-amorphen-11-ol synthase, from *Artemisia maritima*. *Plant Biotechnology* **2018**, 35, 113-121, doi:10.5511/plantbiotechnology.18.0324a.
  163. Li, J.-X.; Fang, X.; Zhao, Q.; Ruan, J.-X.; Yang, C.-Q.; Wang, L.-J.; Miller, D.J.; Faraldos, J.A.; Allemann, R.K.; Chen, X.-Y.; et al. Rational engineering of plasticity residues of sesquiterpene synthases from *Artemisia annua*: product specificity and catalytic efficiency. *Biochemical Journal* **2013**, 451, 417-426, doi:10.1042/bj20130041.
  164. Berteau, C.M.; Voster, A.; Verstappen, F.W.A.; Maffei, M.; Beekwilder, J.; Bouwmeester, H.J. Isoprenoid biosynthesis in *Artemisia annua*: Cloning and heterologous expression of a germacrene A synthase from a glandular trichome cDNA library. *Archives of Biochemistry and Biophysics* **2006**, 448, 3-12, doi:10.1016/j.abb.2006.02.026.
  165. Cai, Y.; Jia, J.W.; Crock, J.; Lin, Z.X.; Chen, X.Y.; Croteau, R. A cDNA clone for beta-caryophyllene synthase from *Artemisia annua*. *Phytochemistry* **2002**, 61, 523-529, doi:10.1016/s0031-9422(02)00265-0.
  166. Mercke, P.; Bengtsson, M.; Bouwmeester, H.J.; Posthumus, M.A.; Brodelius, P.E. Molecular cloning, expression, and characterization of amorpha-4,11-diene synthase, a key enzyme of artemisinin biosynthesis in *Artemisia annua* L. *Archives of Biochemistry and Biophysics* **2000**, 381, 173-180, doi:10.1006/abbi.2000.1962.
  167. Mercke, P.; Crock, J.; Croteau, R.; Brodelius, P.E. Cloning, expression, and characterization of epi-cedrol synthase, a sesquiterpene cyclase from *Artemisia annua* L. *Archives of Biochemistry and Biophysics* **1999**, 369, 213-222, doi:10.1006/abbi.1999.1358.
  168. Picaud, S.; Brodelius, M.; Brodelius, P.E. Expression, purification and characterization of recombinant (E)-beta-farnesene synthase from *Artemisia annua*. *Phytochemistry* **2005**, 66, 961-967, doi:10.1016/j.phytochem.2005.03.027.
  169. Muangphrom, P.; Misaki, M.; Suzuki, M.; Shimomura, M.; Suzuki, H.; Seki, H.; Muranaka, T. Identification and characterization of (+)-alpha-bisabolol and 7-epi-silphiperfol-5-ene synthases from *Artemisia abrotanum*. *Phytochemistry* **2019**, 164, 144-153, doi:10.1016/j.phytochem.2019.05.010.
  170. Pickel, B.; Drew, D.P.; Manczak, T.; Weitzel, C.; Simonsen, H.T.; Ro, D.-K. Identification and characterization of a kunzeaol synthase from *Thapsia garganica*: implications for the biosynthesis of the pharmaceutical thapsigargin. *Biochemical Journal* **2012**, 448, 261-271, doi:10.1042/bj20120654.
  171. Andersen, T.B.; Rasmussen, S.A.; Christensen, S.B.; Simonsen, H.T. Biosynthesis of tovarol and other sesquiterpenoids in *Thapsia laciniata* Rouy. *Phytochemistry* **2019**, 157, 168-174, doi:10.1016/j.phytochem.2018.10.027.
  172. Trine, A.; Federico, C.; Henrik, S. Optimization of Biochemical Screening Methods for Volatile and Unstable Sesquiterpenoids Using HS-SPME-GC-MS. *Chromatography* **2015**, 2, 277-292.
  173. Pyle, B.W.; Tran, H.T.; Pickel, B.; Haslam, T.M.; Gao, Z.; MacNevin, G.; Vederas, J.C.; Kim, S.-U.; Ro, D.-K. Enzymatic synthesis of valerena-4,7(11)-diene by a unique sesquiterpene synthase from the valerian plant (*Valeriana officinalis*). *Febs Journal* **2012**, 279, 3136-3146, doi:10.1111/j.1742-4658.2012.08692.x.
  174. Yeo, Y.-S.; Nybo, S.E.; Chittiboyina, A.G.; Weerasooriya, A.D.; Wang, Y.-H.; Gongora-Castillo, E.; Vaillancourt, B.; Buell, C.R.; DellaPenna, D.; Celiz, M.D.; et al. Functional Identification of Valerena-1,10-diene Synthase, a Terpene Synthase Catalyzing a Unique Chemical Cascade in the Biosynthesis of Biologically Active Sesquiterpenes in *Valeriana officinalis*. *Journal of Biological Chemistry* **2013**, 288, 3163-3173, doi:10.1074/jbc.M112.415836.
  175. Kwon, M.; Cochrane, S.A.; Vederas, J.C.; Ro, D.-K. Molecular cloning and characterization of drimenol synthase from valerian plant (*Valeriana officinalis*). *Febs Letters* **2014**, 588, 4597-4603, doi:10.1016/j.febslet.2014.10.031.
